# Supplementary material for: Synthetic biohybrid peptidoglycan oligomers enable pan-bacteria-specific labeling and imaging: in vitro and in vivo
Source: Royal Society of Chemistry journal article supplement (doi:10.1039/c9sc06345e), 2020-01-01
Supplement: c9sc06345e1.pdf [file c9sc06345e1.pdf]

## Supporting Information

### **Synthetic Biohybrid Peptidoglycan Oligomers Enable Pan-Bacteria-Specific Labeling and Imaging: *In Vitro* and *In Vivo***

Jing-Xi He, Dr. Kim Le Mai Hoang, Shu Hui Kho, Dr. Zhong Guo, Wenbin Zhong, Dr. Kishore Reddy Venkata Thappeta, Dr. Rubí Zamudio-Vázquez, Sin Ni Hoo, Qirong Xiong, Prof. Hongwei Duan, Prof. Liang Yang, Prof. Mary B. Chan-Park\* and Prof. Xue-Wei Liu\*

### **Outline**

|                                                                                     | <b>Page</b> |
|-------------------------------------------------------------------------------------|-------------|
| <b>Materials</b> .....                                                              | <b>2</b>    |
| <b>Experimental for Chemical Synthesis</b> .....                                    | <b>4</b>    |
| <b>Gel Permeation Chromatography (GPC) and Dynamic Light Scattering (DLS)</b> ..... | <b>19</b>   |
| <b>Lysozyme Degradation Assay</b> .....                                             | <b>21</b>   |
| <b>Stimulated Emission Depletion Microscopy (STED)</b> .....                        | <b>24</b>   |
| <b>Preparation of L-form Enterococcus and TIRF Microscopy</b> .....                 | <b>25</b>   |
| <b>Cryo-Transition Electron Microscopy (cryo-TEM)</b> .....                         | <b>28</b>   |
| <b>Measurement of Fluorescence Intensity</b> .....                                  | <b>29</b>   |
| <b>Isothermal Titration Calorimetry (ITC)</b> .....                                 | <b>48</b>   |
| <b>Minimum inhibitory concentration (MIC)</b> .....                                 | <b>48</b>   |
| <b>Cytotoxicity evaluation</b> .....                                                | <b>49</b>   |
| <b>Bacterial detection with PGOs</b> .....                                          | <b>49</b>   |
| <b>Imaging of fluorescence <i>in vivo</i></b> .....                                 | <b>50</b>   |
| <b>References</b> .....                                                             | <b>50</b>   |

## Materials

Chitosan ( $M_w \leq 3000$  Da, degree of deacetylation  $> 85\%$ ) was purchased from Carbosynth Ltd. (Berkshire, UK). *N*-(3-Dimethylaminopropyl)-*N'*-ethylcarbodiimide hydrochloride (EDCI), 1-[Bis(dimethylamino)methylene]-1*H*-1,2,3-triazolo[4,5-*b*]pyridinium 3-oxid hexafluorophosphate (HATU), 3*H*-[1,2,3]-Triazolo[4,5-*b*]pyridin-3-ol (HOAt) and all amino acids used in synthesis were purchased from GL Biochem Ltd. (Shanghai, China). Membrane dye FM 1-43fx was purchased from Thermo Fisher Scientific Inc. (Waltham, USA). All other chemicals used in synthesis were purchased from Sigma-Aldrich Co. LLC. (St. Louis, USA). Bacterial strains (*Escherichia coli* ATCC 29425, ATCC958, ATCC8739, *Pseudomonas aeruginosa* ATCC 27853, *Staphylococcus aureus* ATCC BAA-40, ATCC 1556, ATCC29213 *Enterococcus faecalis* ATCC 700802, and *Bacillus Subtilis* ATCC 6633) were purchased from the American Type Culture Collection (Manassas, USA) and stored at  $-80$  °C. Mueller-Hinton broth (MHB, Difco), brain heart infusion broth (BHI, Difco) and trypticase soy broth (TSB, Difco) were purchased from Beckton, Dickinson and company (Franklin Lakes, USA). Enzyme was purchased from Cusabio (Texas, USA). Dialysis tubing was purchased from Spectra/Por (Singapore).

The reactions were all performed under nitrogen atmosphere. Starting materials and reagents were all purchased commercially and used as received. Solvents used in reactions were all purified according to standard procedures in literature. Thin layer chromatography (TLC) with Merck TLC silica gel 60 F254 plate was used to check reaction progress. UV, or potassium permanganate staining if necessary, was used to visualize compounds on TLC plates. Flash column chromatography with silica gel 60 (0.010-0.063 mm) and gradient solvent system was

used to isolate products.  $^1\text{H}$  and  $^{13}\text{C}$  NMR spectra were obtained using 400 MHz Bruker AVIII 400 spectrometer or 500 MHz Bruker AV 500 spectrometer. Tetramethylsilane (TMS) was used as internal standard in measurement of chemical shifts (ppm). Multiplicities were reported as s (singlet), d (doublet), t (triplet), q (quartet), m (multiplet or unsolved), br s (broad singlet) or dd (doublet of doublets). The number of protons (n) corresponding to a resonance signal was indicated as nH and coupling constants were reported as J values in units of Hz. Characterization data for known compounds were checked in comparison with literature for consistency and not presented in this report. Polymeric substrates were purified by dialysis using a dialysis tubing cellulose membrane (3.5 kDa MWCO) for 2 days. Shimadzu LCsolution and Kromasil 100-5C8 reverse phase column was used for HPLC analysis with deuterium lamp at 280 nm.

## Experimental for Chemical Synthesis

Protection of chitosan was done following protocols similar to those reported by Ifuku *et al* and Gagnon *et al*.<sup>[1]</sup> Coupling with peptide, glycosylation and deprotection followed protocols similar to those reported by Kahne *et al* and Wong *et al*.<sup>[2]</sup> Whereas substrates were prepared following to literature, <sup>1</sup>H NMR for substrates were attached below for reference. In addition, <sup>13</sup>C NMR and HRMS were given for newly prepared peptides. Calculations are based on repeating monosaccharide units on the oligomers.

### Synthesis of polymer **2**.

Chitosan **1** (2.0 g, 12.5 mmol) was dissolved in 100 mL mixture of AcOH/H<sub>2</sub>O (v/v, 1:9). Phthalic anhydride (5.6 g, 37.5 mmol) was then added and the solution was stirred at 120 °C for 24 hours before cooling down to room temperature. The solvent was removed under reduced pressure and residue washed with ethanol and diethyl ether to give product **2** (3.3 g, 88%) as an off white solid.

### Synthesis of polymer **3**

Polymer **2** (1.5 g, 5 mmol) was dissolved in 100 mL DMF. Imidazole (2.7 g, 40 mmol) was added, followed by triisopropylsilyl chloride (6.8 g, 35 mmol) dropwise at 0 °C. The reaction mixture was slowly warmed up to room temperature and stirred for 48 hours before solvent was removed under reduced pressure. The residue was washed with ethanol and diethyl ether to give product **3** (1.7 g, 71%) as a yellow solid.

### Synthesis of polymer **4**

Polymer **3** (0.96 g, 2 mmol) was dissolved in 20 mL DMF at 0 °C. Sodium hydride (200 mg, 5 mmol) was added portionwise and then (*S*)-(-)-2-Bromopropionic acid (153 mg, 1 mmol)

was added dropwise. The reaction mixture was slowly warmed up to room temperature and stirred for 48 hours before quenching with methanol. The solvent was removed under reduced pressure and residue washed with water and ethanol consecutively to give product **4** (0.69 g, 69%) as a yellow solid.

#### Synthesis of polymer **5**

Polymer **4** (0.50 g, 1 mmol) and 4-dimethylaminopyridine (244 mg, 2 mmol) were dissolved in 20 mL pyridine at 0 °C. Acetic anhydride (510 mg, 5 mmol) was added to the solution dropwise with stirring. The reaction was slowly warmed up to room temperature and stirred for 48 hours. Then solvent was removed under reduced pressure and the residue was washed with saturated ammonium chloride solution, followed by water to give product **5** (0.46 g, 92%) as an off white solid.

#### Synthesis of polymer **6**

To a solution of pentapeptide **12** (91 mg, 0.1 mmol) in 20 mL CH<sub>2</sub>Cl<sub>2</sub> was added 4 mL 2.0 M HCl in Et<sub>2</sub>O and the mixture was stirred at room temperature for 4 hours. After checking full consumption of **12** by TLC, the solvent was removed *in vacuo* and the crude H-Ala-D-*iso*-Glu(OBn)-Lys(Fmoc)-D-Ala-D-Ala-OMe·HCl **13** was used without further purification. Polymer **5** (100 mg, 0.2 mmol) and DIPEA (52 mg, 0.4 mmol) were dissolved in 25 mL DMF at room temperature. To the stirring solution was added HATU (190 mg, 0.5 mmol) and HOAt (68 mg, 0.5 mmol). After 5 min, H-Ala-D-*iso*-Glu(OBn)-Lys(Fmoc)-D-Ala-D-Ala-OMe·HCl (170 mg, 0.2 mmol) was added and the reaction mixture was left stirring overnight. After removing solvent under reduced pressure, the residue was washed with saturated ammonium chloride solution and water to give product **6** (146 mg, 79%) as a brown solid.

### Synthesis of polymer **7**

Polymer **6** (92 mg, 0.1 mmol) was dissolved in 30 mL methanol. Acetic acid (120 mg, 2 mmol), tetrabutylammonium fluoride (1.0 M THF solution, 2.0 mL) and hydrazine (64 mg, 2 mmol) were added consecutively. The mixture was stirred at room temperature for 48 hours before solvent was removed under reduced pressure. The residue was washed with saturated ammonium chloride solution and water, then dried and redissolved in pyridine together with 4-dimethylaminopyridine (25 mg, 0.2 mmol). Acetic anhydride (51 mg, 0.5 mmol) was added to the solution dropwise at 0 °C with stirring. The reaction was slowly warmed up to room temperature and stirred for 48 h. Then solvent was removed under reduced pressure and the residue was washed with saturated ammonium chloride solution, followed by water to give product **7** as a yellow oil. The crude oil was used without further purification.

### Synthesis of polymer **8**

Crude polymer **7** was dissolved in 15 mL THF at 0 °C. Methylamine (1.0 M THF solution, 0.3 mL) was added dropwise and the mixture was slowly warmed up to room temperature with stirring. After 24 hours, the solvent was removed under reduced pressure. The residue was washed with saturated ammonium chloride solution and water, then evaporated to dryness and dissolved in 30 mL dichloromethane. To this solution was added 1*H*-tetrazole (21 mg, 0.3 mmol) and dibenzyl *N,N*-diisopropylphosphoramidite (70 mg, 0.2 mmol) at 0 °C. The mixture was warmed up and stirred at room temperature for 5 hours before cooling to -50 °C. Then *tert*-butyl hydroperoxide (70%, 1 mL) was added and the mixture was left stirring overnight. After removing solvent under reduced pressure, the residue was washed with saturated ammonium chloride solution, saturated sodium bicarbonate solution and water to give product **8** as a yellow

oil. The crude was used for next step without further purification.

### Synthesis of polymer **9**

Tetradecyl monophosphate (59 mg, 0.2 mmol) was dissolved in 10 mL mixture of DMF and THF (v/v, 1:1) under room temperature. Then CDI (162 mg, 1 mmol) was added and the solution was stirred for 2 h before 1 mL dried methanol was added. The mixture was stirred for another 1 hour and dried to give activated tetradecyl phosphoroimidazolidate (C<sub>14</sub>PI<sub>m</sub>). To a solution of crude polymer **8** in 10 mL MeOH was added 8 mg Pd on activated charcoal. The suspension was stirred under H<sub>2</sub> atmosphere at room temperature overnight before filtration through a pad of celite. The solution was dried, and redissolved in 10 mL DMF before transferring to C<sub>14</sub>PI<sub>m</sub>. Subsequently, 1*H*-tetrazole (14 mg, 0.2 mmol) was added and the mixture was stirred for 24 hours before evaporation to dryness. Then the residue was dispersed in 20 mL mixture of methanol and water (v/v, 1:1) and LiOH (1 M aqueous solution, 1 mL) was added. The mixture was stirred for 2 hours before dialysis and lyophilization to give the final product **9** (50 mg, 50% for three steps) as a yellow solid. HPLC analysis was performed using NH<sub>4</sub>OH/MeOH from 0/100 to 10/90 in 60 min and **9** had a retention time of 7 min. Tagging by sulforhodamine B was done following literature procedures.<sup>[3]</sup> Generally, 10 mg **9** was dissolved in 2 mL carbonate buffer (0.1 M, pH = 9) and a solution of sulforhodamine B acid chloride in DMF (2 mg/mL, 100  $\mu$ L) was added. The mixture was left to stir in dark at room temperature for 2 hours and dialyzed afterwards to give PGOs-rhodamine.

The pentapeptide **13** for coupling to chitosan backbone was synthesized by a condensation reaction between Boc-Ala-D-*iso*-Glu(OBn)-OH and H-Lys(Fmoc)-D-Ala-D-Ala-OMe followed by Boc removal with hydrogen chloride according to methods reported in literature.<sup>[4]</sup>

Synthesis of compound **11**, Boc-Lys(Fmoc)-D-Ala-D-Ala-OMe

H-D-Ala-D-Ala-OH (320 mg, 2.00 mmol) was dissolved in 20 mL MeOH at 0 °C and acetyl chloride (785 mg, 10.0 mmol) was added dropwise. The reaction was stirred for 15 minutes before slowly warming up to room temperature and stirring overnight. After removing solvents *in vacuo*, crude H-D-Ala-D-Ala-OMe **10** was dissolved in 10 mL anhydrous DMF followed by addition of DIPEA (646 mg, 5.00 mmol). Subsequently, Boc-Lys(Fmoc)-OH (937 mg, 2.00 mmol), HOAt (408 mg, 3.00 mmol) and EDCI (575 mg, 3.00 mmol) were added and the mixture was stirred for 2 hours before pouring into 50 mL water. Then EtOAc (30 mL x 2) was used for extraction and the combined organic layer was washed with water (50 mL x 5), brine (50 mL) and dried with Na<sub>2</sub>SO<sub>4</sub>. The crude was purified by flash column chromatography (50% CH<sub>2</sub>Cl<sub>2</sub>/EtOAc) to give compound **11** as a white solid (0.99 g, 79%). <sup>1</sup>H NMR (400 MHz, DMSO-*d*<sub>6</sub>) δ 8.18 (d, *J* = 7.2 Hz, 1H), 7.99 (d, *J* = 7.9 Hz, 1H), 7.88 (d, *J* = 7.5 Hz, 2H), 7.68 (d, *J* = 7.5 Hz, 2H), 7.41 (t, *J* = 7.5 Hz, 2H), 7.33 (t, *J* = 7.5 Hz, 2H), 7.25 (t, *J* = 5.9 Hz, 1H), 6.92 (d, *J* = 7.3 Hz, 1H), 4.40 – 4.15 (m, 6H), 3.60 (s, 3H), 2.95 (q, *J* = 6.6 Hz, 2H), 1.63 – 1.06 (m, 21H). <sup>13</sup>C NMR (101 MHz, DMSO-*d*<sub>6</sub>) δ 173.22, 172.44, 172.24, 156.52, 155.94, 144.39, 141.19, 128.04, 127.49, 125.58, 120.56, 78.60, 65.65, 54.93, 52.31, 48.00, 47.92, 47.24, 32.56, 31.79, 30.06, 29.52, 28.61, 23.18, 18.64, 17.23. HRMS (ESI) calcd. for C<sub>33</sub>H<sub>45</sub>N<sub>4</sub>O<sub>8</sub> [M+H]: 625.3237, found: 625.3237.

Synthesis of compound **12**, Boc-Ala-D-*iso*-Glu(OBn)-Lys(Fmoc)-D-Ala-D-Ala-OMe.

To a solution of **11** (624 mg, 1.00 mmol) in 30 mL CH<sub>2</sub>Cl<sub>2</sub> was added 5 mL 2.0 M HCl in Et<sub>2</sub>O and the mixture was stirred at room temperature for 4 hours. After checking full consumption of **11** by TLC, the solvent was removed *in vacuo* and the crude H-Lys(Fmoc)-D-



Ala-D-Ala-OMe·HCl was used without further purification. Boc-Ala-OSu (286 mg, 1.00 mmol) and H-D-Glu(OH)-OBn (237 mg, 1.00 mmol) were dissolved in 10 mL DMF and 2 mL saturated NaHCO<sub>3</sub> (aq.) solution was added to the mixture. After stirring at room temperature overnight, 30 mL water was added and pH of the solution was adjusted to 2 by careful addition of HCl. The solution was extracted with EtOAc (20 mL x 2) and the combined organic layer was washed with 1 mM aq. HCl (30 mL x 2), water (30 mL x 2) and brine (30 mL). After drying over Na<sub>2</sub>SO<sub>4</sub>, the solvent was removed *in vacuo* and the crude Boc-Ala-D-*iso*-Glu(OBn)-OH was dissolved in 20 mL DMF. To the solution was added DIPEA (388 mg, 3.00 mmol), crude H-Lys(Fmoc)-D-Ala-D-Ala-OMe·HCl, HATU (760 mg, 2.00 mmol) and HOAt (272 mg, 2.00 mmol). The mixture was stirred at room temperature overnight before 60 mL water was added. Then it was extracted with EtOAc (50 mL x 2) and the combined organic layer was washed with water (80 mL x 5) and brine (80 mL). After removing solvent *in vacuo*, the crude was purified by flash column chromatography (60% CH<sub>2</sub>Cl<sub>2</sub>/Acetone) to give compound **12** (730 mg, 77%) as a white solid. <sup>1</sup>H NMR (400 MHz, DMSO-*d*<sub>6</sub>) δ 8.27 (d, *J* = 7.8 Hz, 1H), 8.18 (d, *J* = 7.5 Hz, 2H), 8.02 (d, *J* = 7.2 Hz, 1H), 7.88 (d, *J* = 7.5 Hz, 2H), 7.84 (d, *J* = 7.5 Hz, 2H), 7.41 (t, *J* = 7.5 Hz, 2H), 7.38 – 7.24 (m, 8H), 6.86 (d, *J* = 7.7 Hz, 1H), 6.60 (t, *J* = 5.9 Hz, 1H), 6.28 (d, *J* = 1.5 Hz, 2H), 5.11 (s, 2H), 4.27 (dh, 3H), 4.15 (q, *J* = 7.2 Hz, 1H), 4.02 (p, *J* = 7.2 Hz, 1H), 3.59 (s, 3H), 2.88 (q, *J* = 6.6 Hz, 2H), 2.19 (q, *J* = 7.7 Hz, 2H), 1.97 (h, *J* = 7.3, 6.6 Hz, 1H), 1.83 (dq, *J* = 15.0, 8.4, 7.6 Hz, 1H), 1.65 – 0.97 (m, 24H). <sup>13</sup>C NMR (101 MHz, DMSO-*d*<sub>6</sub>) δ 173.49, 173.28, 172.52, 171.99, 157.77, 155.44, 143.03, 139.87, 137.88, 136.35, 129.38, 128.84, 128.43, 128.18, 127.74, 121.83, 120.48, 110.19, 78.54, 66.39, 53.50, 52.25, 52.04, 50.13, 48.07, 48.02, 31.85, 31.67, 30.06, 29.84, 28.63, 27.37, 23.11, 18.92, 18.40, 17.22.

HRMS (ESI) calcd. for C<sub>48</sub>H<sub>63</sub>N<sub>6</sub>O<sub>12</sub> [M+H]: 915.4504, found: 915.4513.

Rhodamine labeled pentapeptide **14** was synthesized by replacing Fmoc on lysine side chain with rhodamine B, followed by removal of Boc with hydrogen chloride using the same procedure as **13** and removal of OBn and OMe with LiOH using the same procedure as **9**. The product was dialyzed using 100-500 MWCO dialysis tubing and lyophilized without further purification.

Synthesis of compound **15**, Boc-Ala-D-*iso*-Glu(OBn)-Lys(Rhodamine)-D-Ala-D-Ala-OMe.

To a solution of **12** (91.4 mg, 0.10 mmol) in 10 mL DMF was added 2 mL diethylamine and the mixture was stirred at room temperature for 1 hour. After checking full consumption of **12** by TLC, diethylamine was removed *in vacuo* and rhodamine B (71.9 mg, 0.15 mmol), HOAt (20.4 mg, 0.15 mmol) and EDCI (28.8 mg, 0.15 mmol) were added. Then DIPEA (38.8 mg, 0.30 mmol) was added into the solution and it was left to stir at room temperature overnight before 30 mL water was added. Then it was extracted with EtOAc (30 mL x 2) and the combined organic layer was washed with water (50 mL x 5) and brine (50 mL). After removing solvent *in vacuo*, the crude was purified by flash column chromatography (40% CH<sub>2</sub>Cl<sub>2</sub>/Acetone) to give compound **15** (73.6 mg, 64%) as a red solid. <sup>1</sup>H NMR (500 MHz, Chloroform-d) δ 8.34 (d, J = 7.9 Hz, 1H), 7.82 (s, 1H), 7.74 (s, 3H), 7.55 (q, J = 3.8 Hz, 2H), 7.33 (dd, J = 14.2, 5.8 Hz, 4H), 7.24 (d, J = 15.1 Hz, 2H), 7.09 – 6.99 (m, 4H), 6.85 (d, J = 9.8 Hz, 2H), 6.77 (s, 2H), 5.01 (s, 2H), 4.24 (t, J = 7.2 Hz, 3H), 3.66 (q, J = 7.5 Hz, 10H), 3.38 – 3.31 (m, 1H), 2.94 (d, J = 37.7, 35.0 Hz, 1H), 2.33 (s, 1H), 2.14 (s, 1H), 2.02 (s, 2H), 1.74 – 1.60 (m, 4H), 1.48 – 1.40 (m, 10H), 1.39 – 1.33 (m, 23H), 1.32 – 1.23 (m, 18H), 1.22 – 1.15 (m, 4H), 0.97 – 0.82 (m,

16H).  $^{13}\text{C}$  NMR (101 MHz, Chloroform-d)  $\delta$  167.88, 165.14, 157.75, 155.61, 134.57, 133.46, 133.23, 132.60, 131.58, 131.33, 131.00, 130.51, 130.38, 128.93, 128.68, 128.65, 128.58, 128.40, 114.23, 113.65, 96.59, 68.30, 67.65, 46.27, 38.89, 30.51, 29.83, 29.07, 28.52, 23.90, 23.11, 14.17, 12.81, 11.09, 1.15.

#### Synthesis of polymer **16**, chitosan-pentapeptide conjugate with rhodamine tag

To a solution of pentapeptide **15** (23.0 mg, 0.02 mmol) in 20 mL  $\text{CH}_2\text{Cl}_2$  was added 4 mL 2.0 M HCl in  $\text{Et}_2\text{O}$  and the mixture was stirred at room temperature for 4 hours. After checking full consumption of **15** by TLC, the solvent was removed *in vacuo* and DIPEA (12.9 mg, 0.1 mmol) in 20 mL DMF was added at room temperature. Then polymer **5** (10.0 mg, 0.02 mmol), HATU (19.0 mg, 0.05 mmol) and HOAt (6.8 mg, 0.05 mmol) were added into the solution and the reaction was left to stir overnight. After removing solvent under reduced pressure, the residue was washed with saturated ammonium chloride solution and water to give a crude of protected chitosan-pentapeptide conjugate. The crude was redispersed in 10 mL MeOH, followed by addition of tetrabutylammonium fluoride (261 mg, 1 mmol), hydrazine (32 mg, 1 mmol) and LiOH (1 M aqueous solution, 0.1 mL). The mixture was stirred for another 12 hours before dialysis and lyophilization to give the final product **16** as a red solid.

#### Synthesis of inhibitor **17**

Crude polymer **7** was dissolved in 15 mL THF at 0 °C. Methylamine (1.0 M THF solution, 0.3 mL) was added dropwise and the mixture was slowly warmed up to room temperature with stirring. After 24 hours, the solvent was removed under reduced pressure. The residue was washed with saturated ammonium chloride solution and water, then evaporated to dryness and dissolved in 30 mL dichloromethane. To this solution was added 1*H*-tetrazole (21 mg, 0.3 mmol)

and methyl (2R)-3-(((benzyloxy)(diisopropylamino)phosphanyl)oxy)-2-(dodecyloxy)propanoate<sup>[5]</sup> (102 mg, 0.2 mmol) at 0 °C. The mixture was warmed up and stirred at room temperature for 5 hours before cooling to -50 °C. Then *tert*-butyl hydroperoxide (70%, 1 mL) was added and the mixture was left stirring overnight. After removing solvent under reduced pressure, the residue was washed with saturated ammonium chloride solution, saturated sodium bicarbonate solution and water to give crude product **17**. Then the residue was dispersed in 20 mL mixture of methanol and water (v/v, 1:1) and LiOH (1 M aqueous solution, 1 mL) was added. The mixture was stirred for 2 hours before dialysis and lyophilization to give the final product **17** (70 mg, 70% for two steps) as a yellow solid.

**Figure S1** | <sup>1</sup>H NMR spectrum for **3** (400 MHz, DMSO)

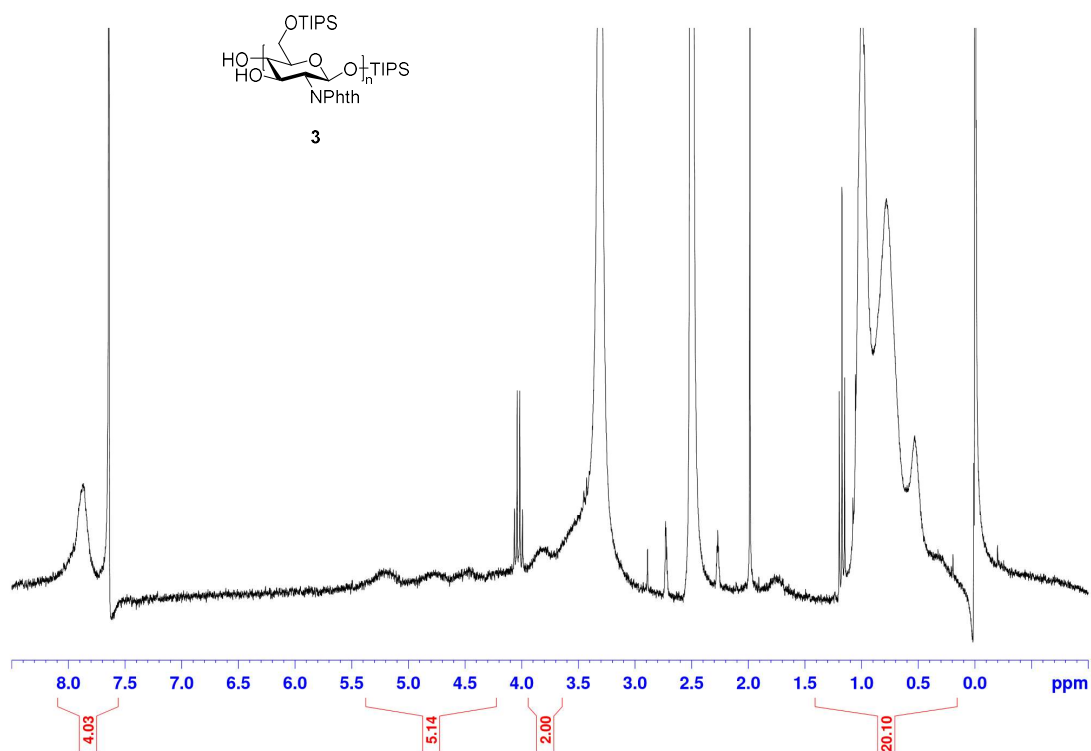

**Figure S2** |  $^1\text{H}$  NMR spectrum for **4** (400 MHz, DMSO)

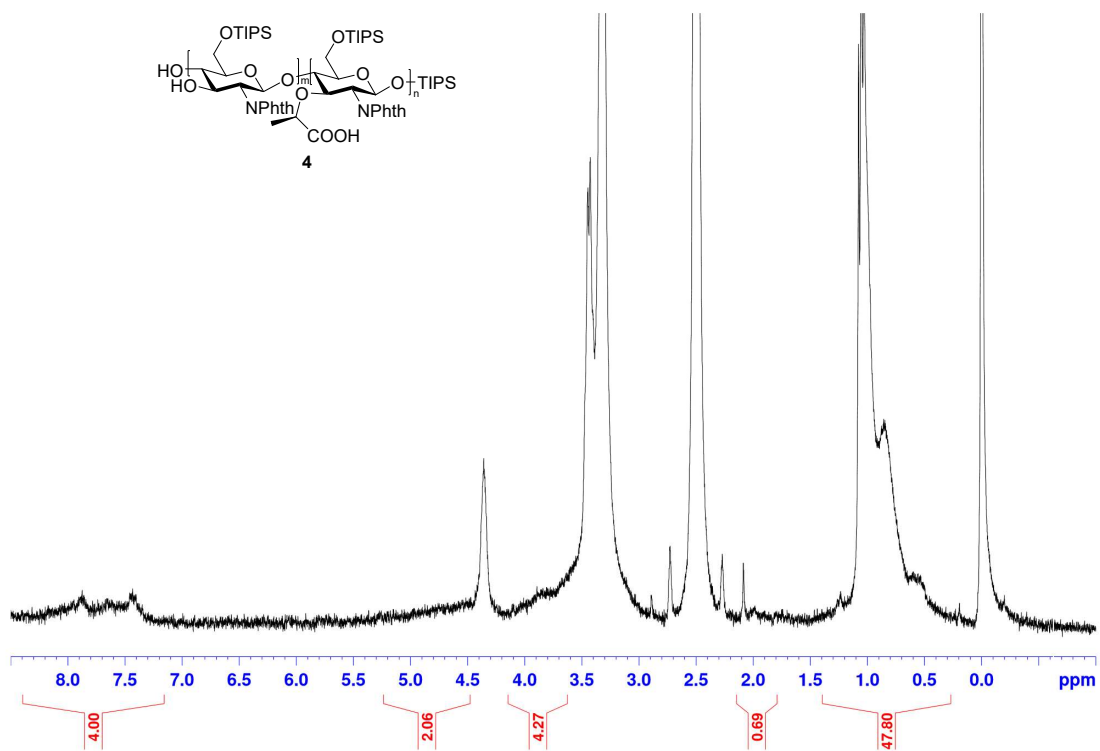

**Figure S3** |  $^1\text{H}$  NMR spectrum for **5** (400 MHz, DMSO)

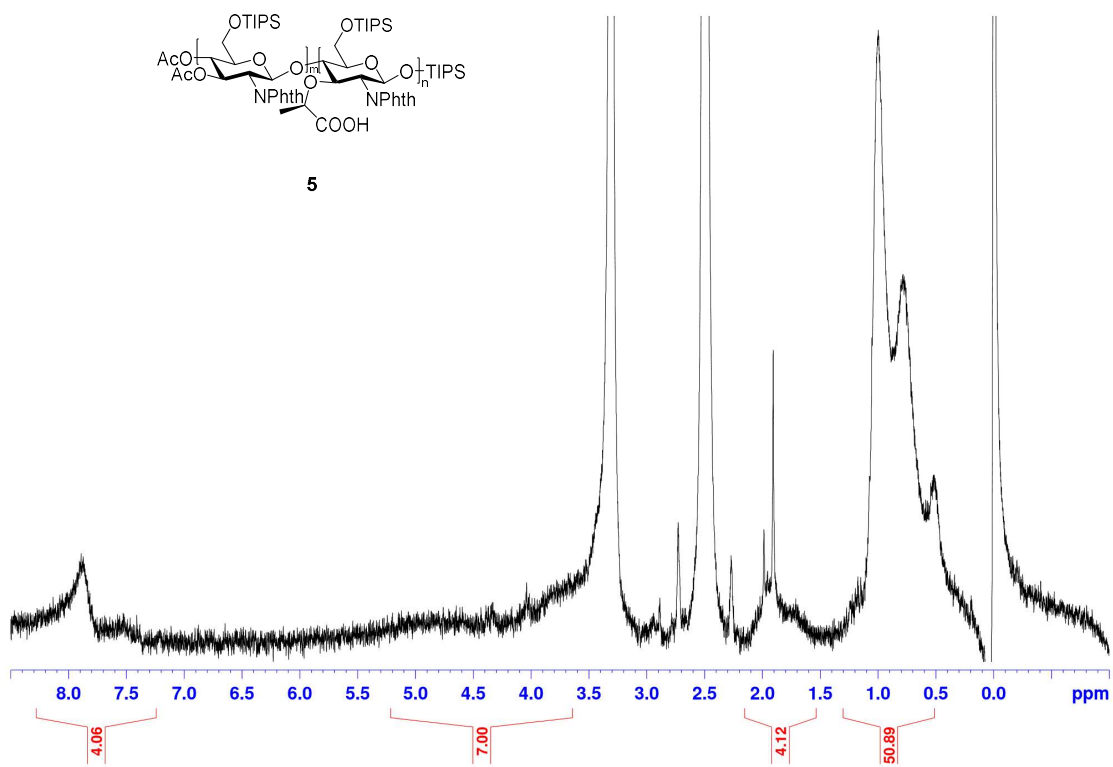

**Figure S4** |  $^1\text{H}$  NMR spectrum for **6** (400 MHz, DMSO)

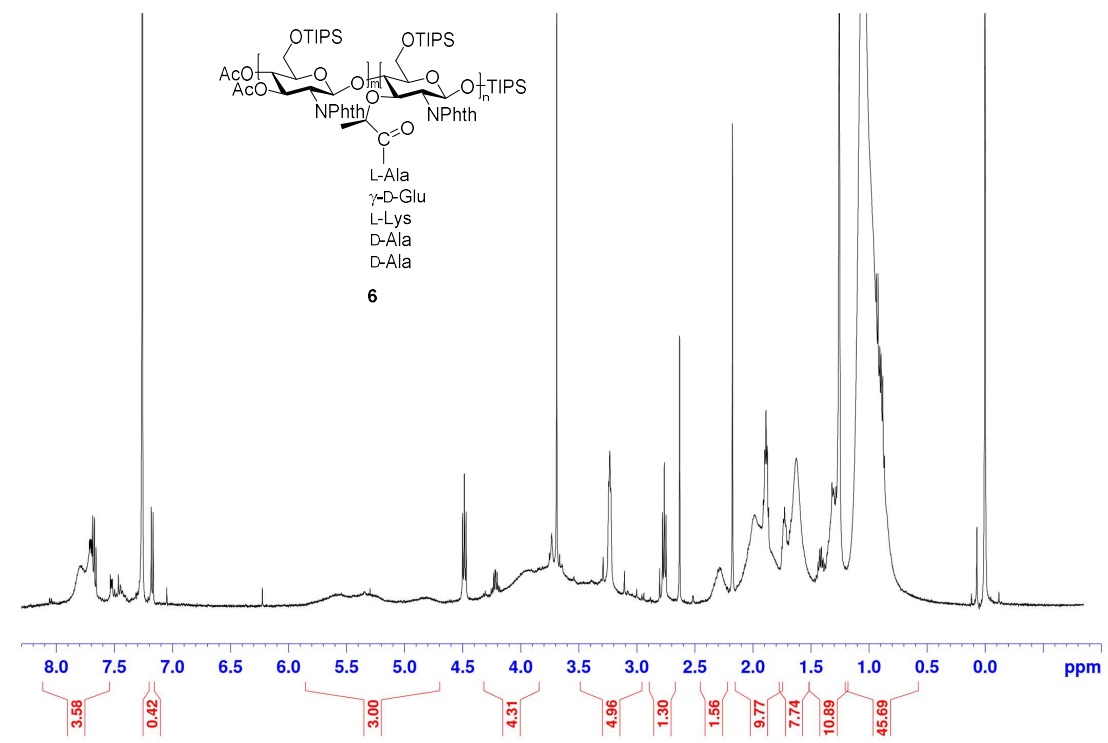

**Figure S5** |  $^1\text{H}$  NMR spectrum of fluorescently labeled **9** used for STED confocal microscopy (400 MHz,  $\text{D}_2\text{O}$ )

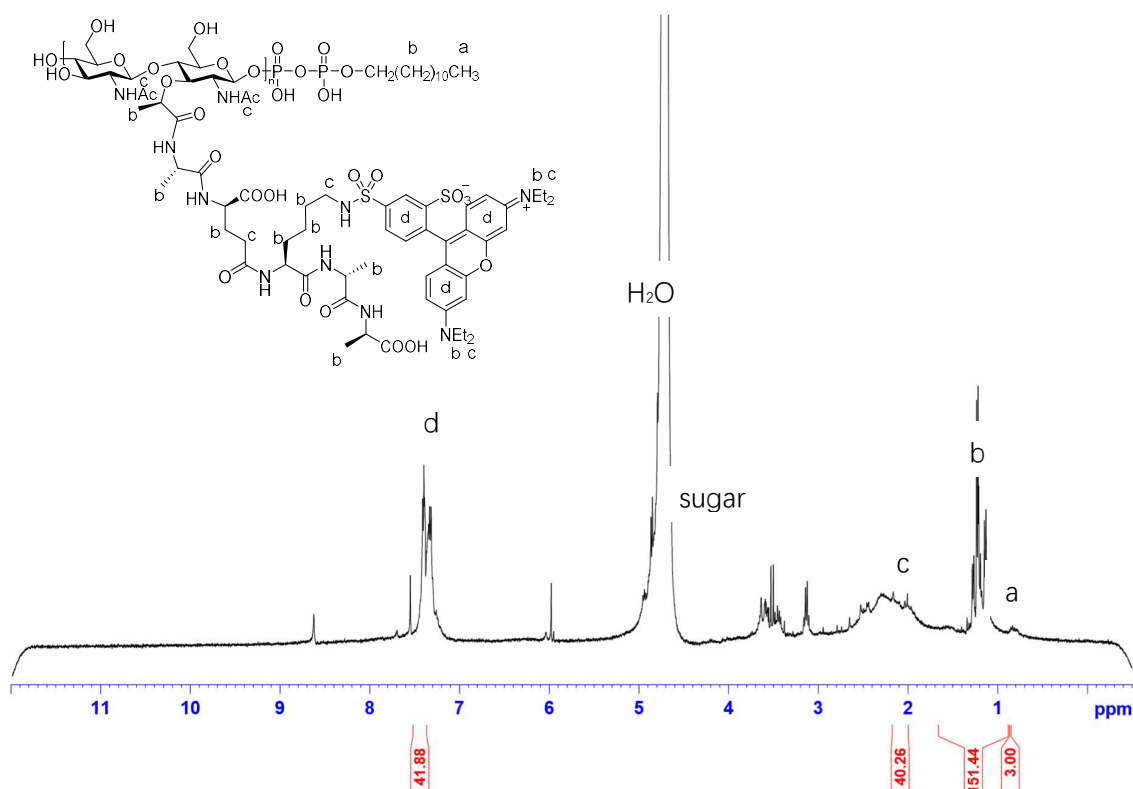

The methyl end of lipid moiety (0.8-0.9, **a**) has been calibrated to be 3 protons (1 lipid as base for calculation)

Aromatic protons (7-8, **d**) were only from rhodamine (9 per molecule), and 42 protons in total matched 4.6 rhodamine moieties per polymer on average.

Alkyl protons (0.9-1.5, **b**) were from lipid (24 per molecule), rhodamine (6 per molecule) and peptide (20 per molecule), and 151 protons matched 5.0 peptide moieties per polymer on average

Acetyl protons (2-2.2, **c**) were from NAG/NAM (3 per molecule) and glutamate on peptide (2 per molecule), and 40 protons matched 10.0 sugar moieties per polymer on average.

**Figure S6** |  $^1\text{H}$  NMR spectrum for **11** (400 MHz, DMSO)

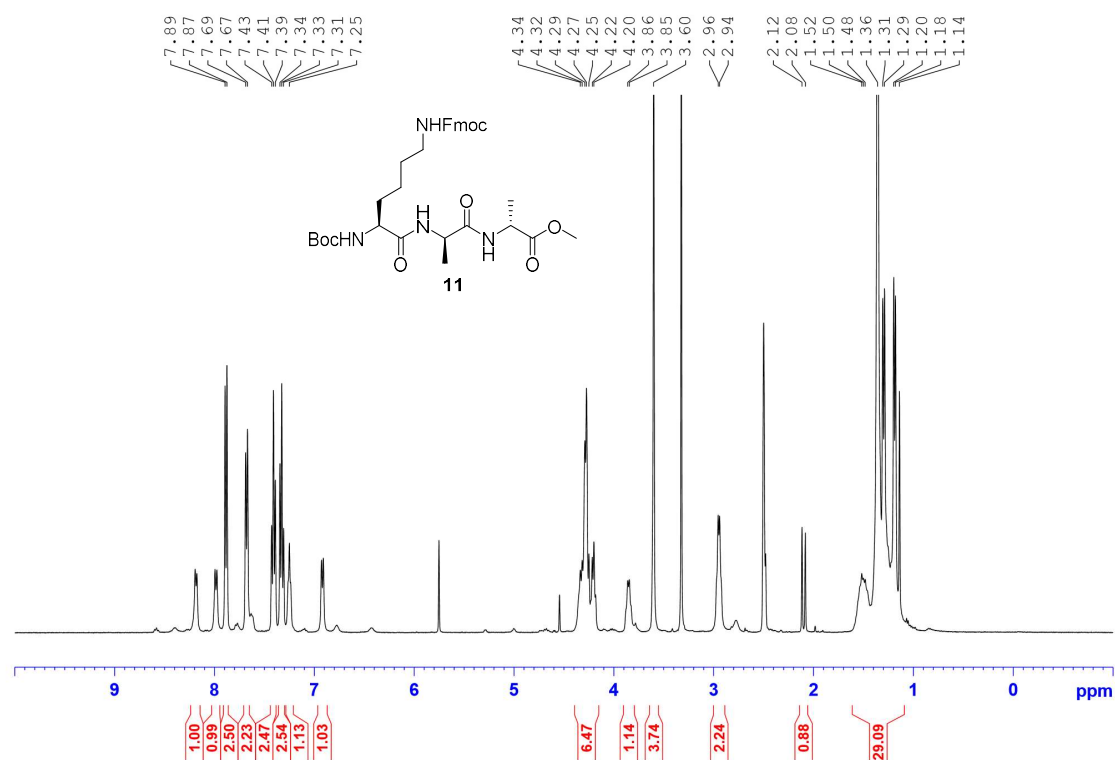

**Figure S7** |  $^{13}\text{C}$  NMR spectrum for **11** (101 MHz, DMSO)

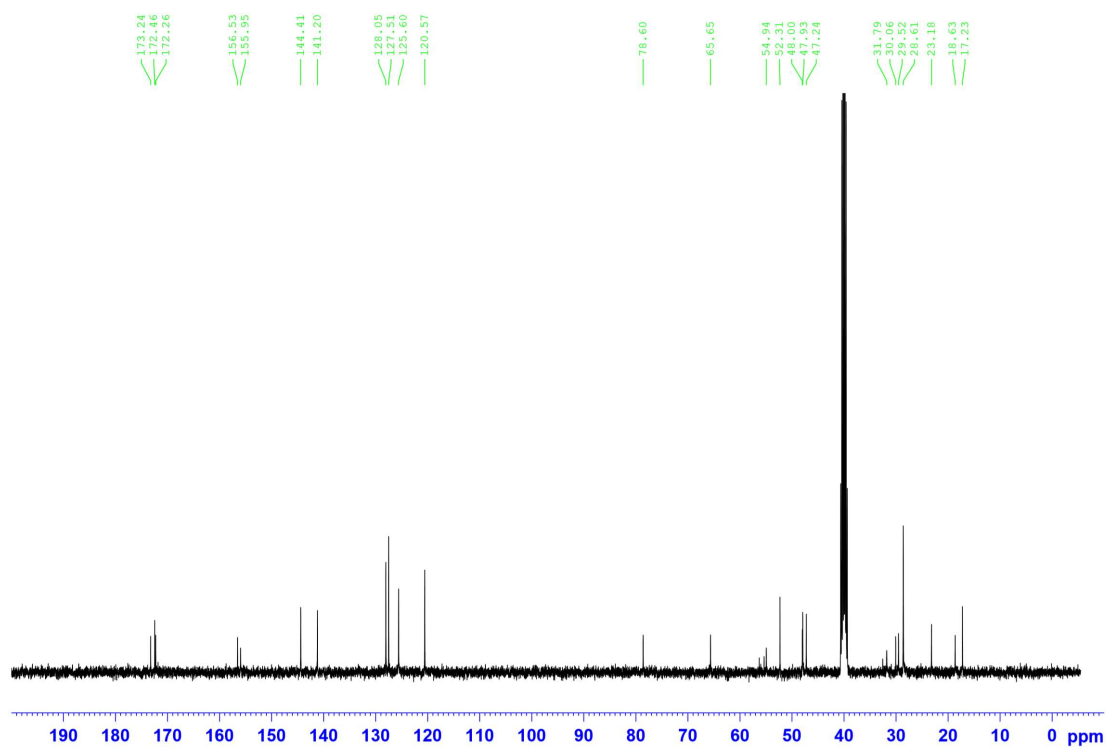

**Figure S8** |  $^1\text{H}$  NMR spectrum for **12** (400 MHz, DMSO)

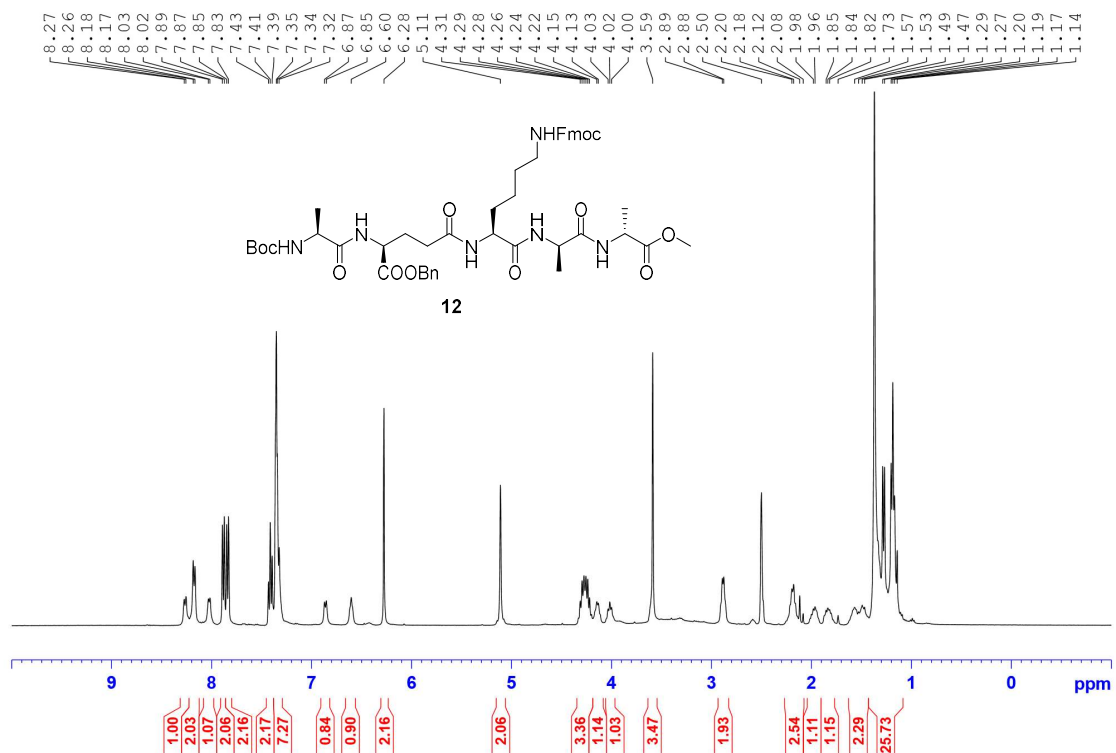



Figure S9 |  $^{13}\text{C}$  NMR spectrum for **12** (101 MHz, DMSO)

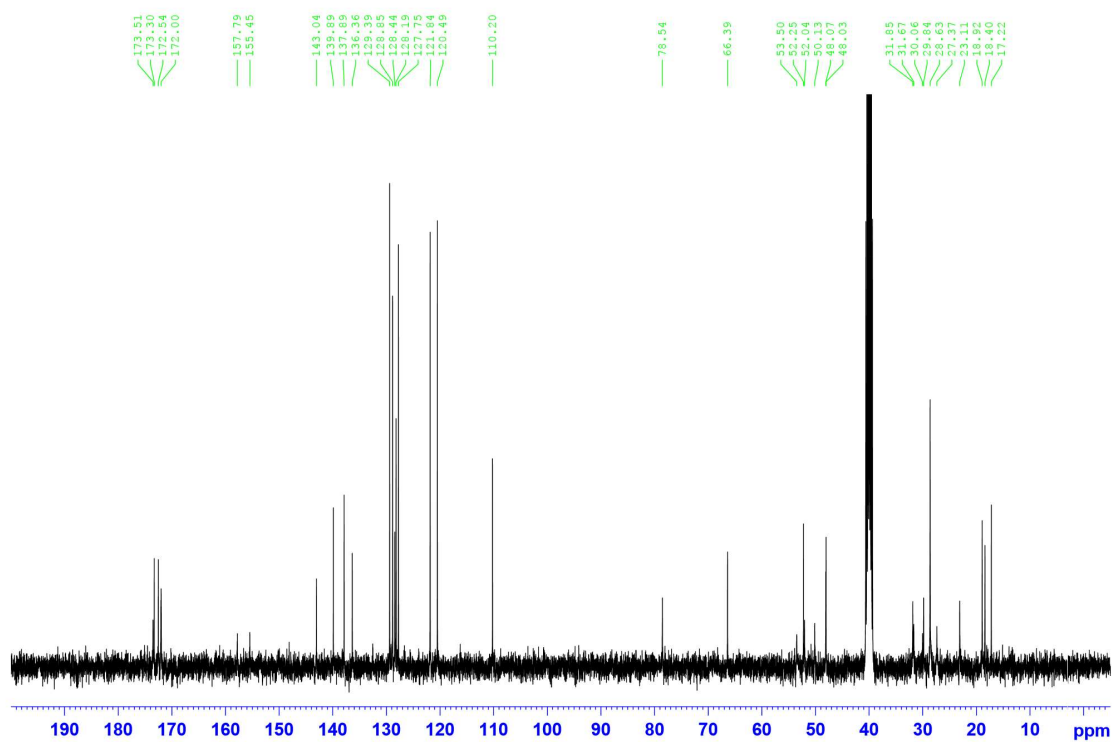

Figure S10 |  $^1\text{H}$  NMR spectrum for **15** (500 MHz, Chloroform-*d*)

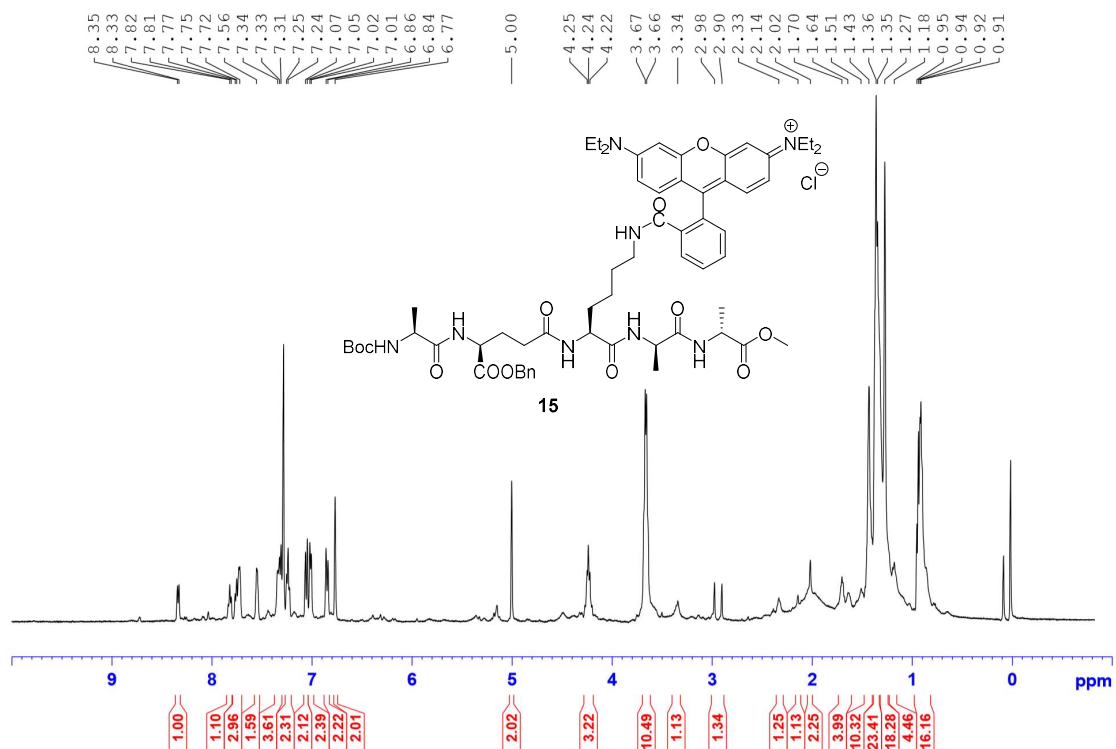

Figure S11 |  $^{13}\text{C}$  NMR spectrum for **15** (101 MHz, Chloroform-*d*)

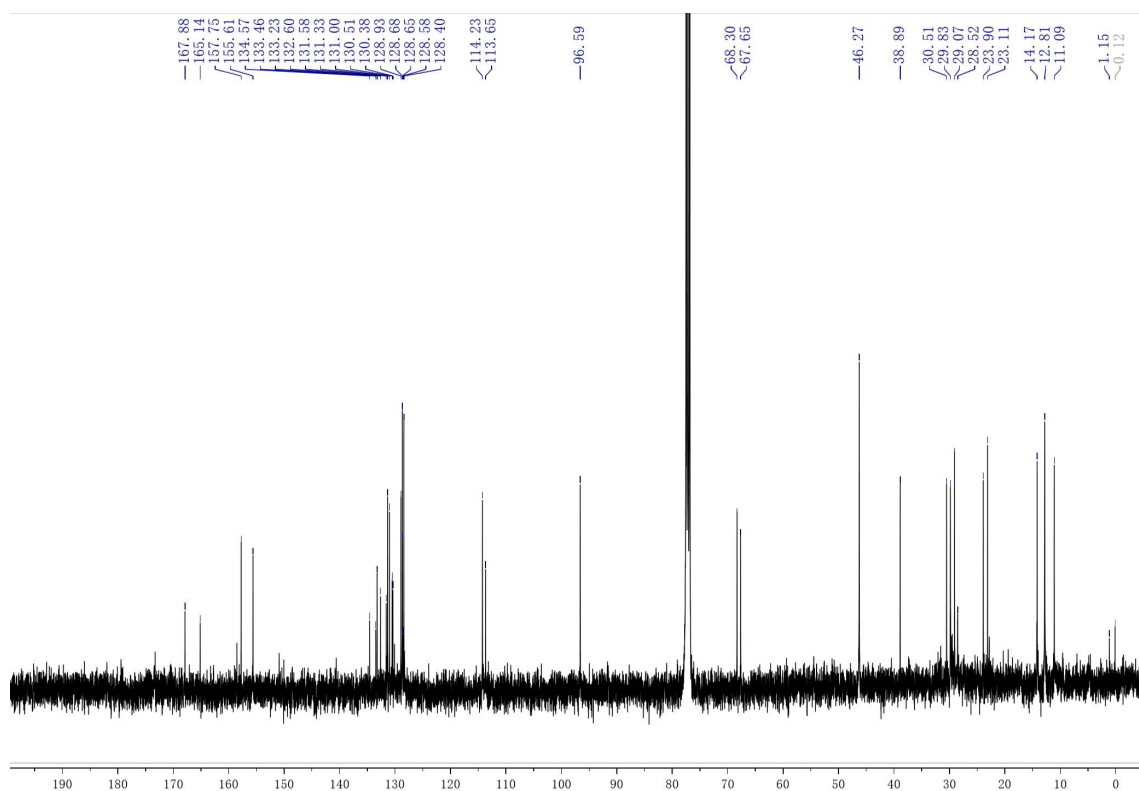

Figure S12 |  $^1\text{H}$  NMR spectrum for rhodamine labeled Chitosan-peptide **16** (500 MHz,  $\text{D}_2\text{O}$ )

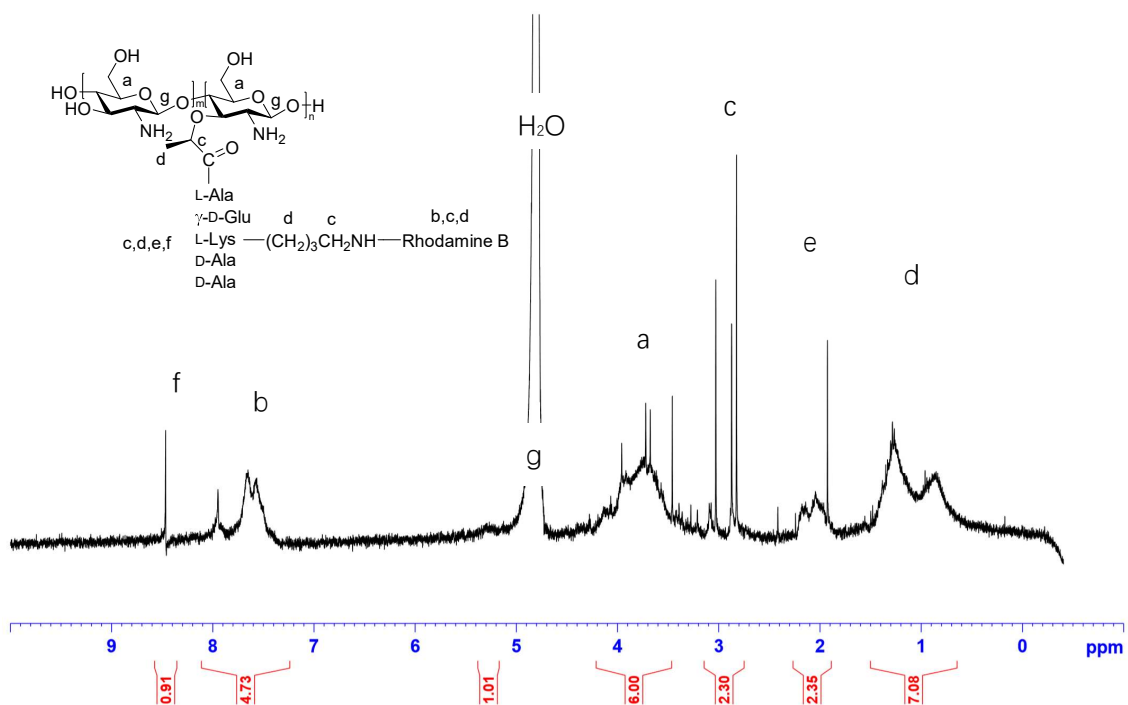

**Figure S13** |  $^1\text{H}$  NMR spectrum for **17** (500 MHz,  $\text{D}_2\text{O}$ )

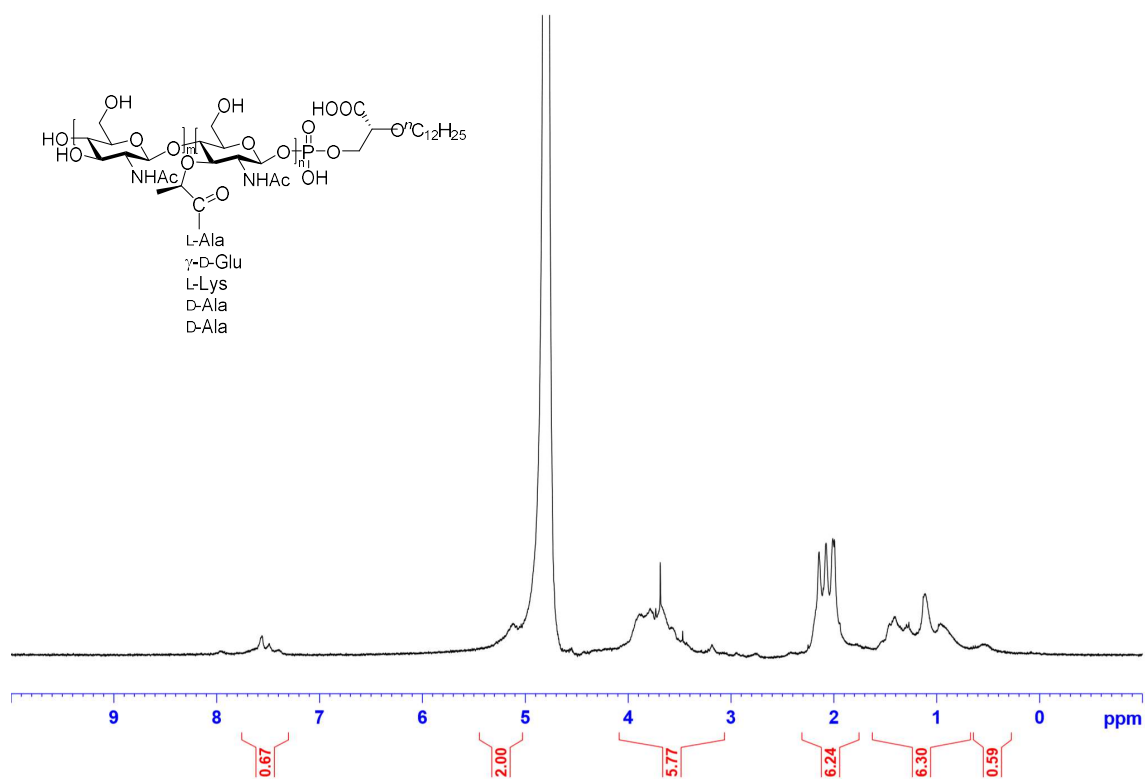

### Gel Permeation Chromatography (GPC) and Dynamic Light Scattering (DLS)

Shodex SB-803 HQ and SB-805 HQ columns (Showa Denko, Tokyo, Japan) were connected in series for GPC in Agilent 1260 infinity system (Agilent, CA, USA). Samples were eluted at 0.5 mL/s through columns. Light scattering was done using Malvern zetasizer (Malvern Instruments Ltd, Malvern, UK). Secondary structures existed in the solutions of PGOs to broaden and shift their peak in GPC, which was confirmed by DLS.

**Figure S14** | (a) Gel permeation chromatography results of PGOs eluted with 0.05 M NaCl in deionized water. Peak broadening was from various self-assemblies of the polymer molecules. (b) Size distribution of 100  $\mu\text{g}/\text{mL}$  PGOs in deionized water measured by dynamic light scattering. Results indicated spontaneous self-assembly of PGOs, probably due to the amphiphilic nature from co-existence of sugar, peptide and lipid moieties in the substrate.

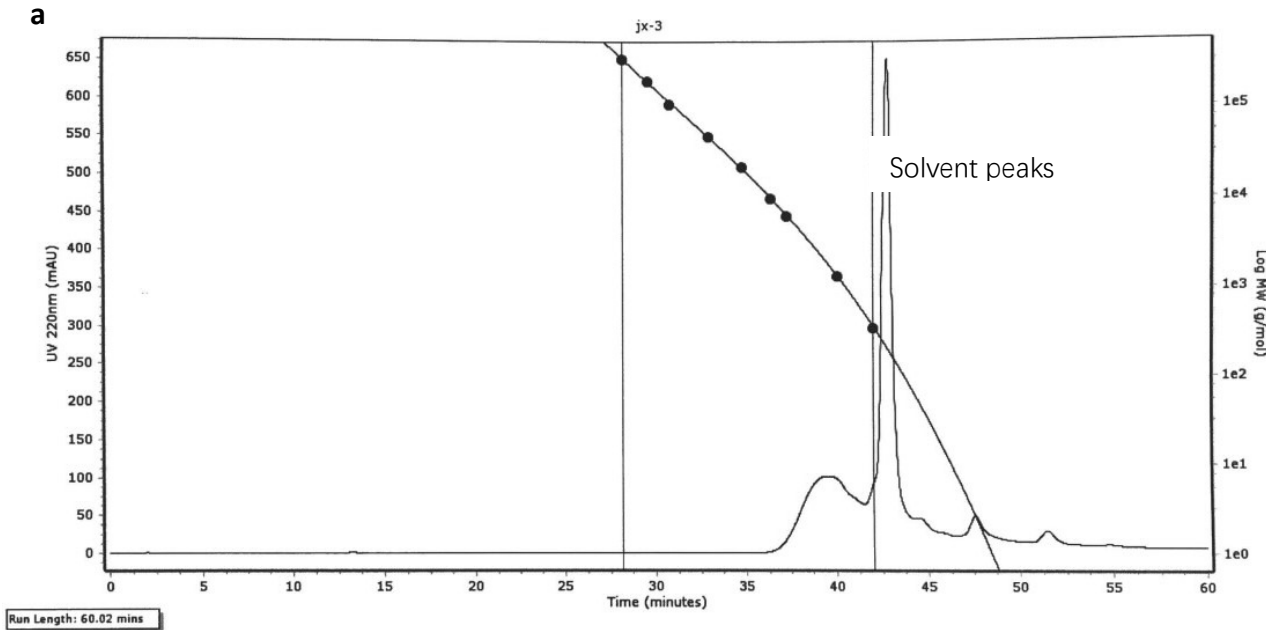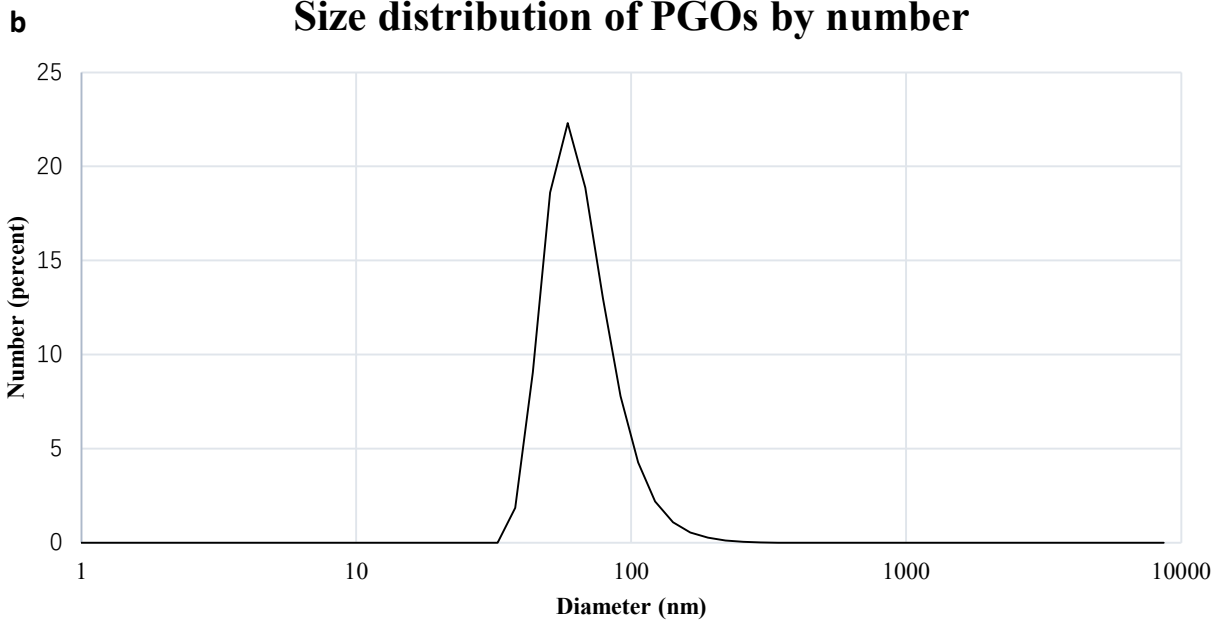

### **Lysozyme Degradation Assay**

To prepare crude for mass analysis, 2 mg substrate **9** was dissolved in 0.2 mL 10 mM acetate buffer (pH = 5.0) before addition of 0.4 mg lysozyme and incubation at 38 °C for 24 hours. Then the enzyme was pelleted by centrifugation at 1,500 X g for 5 min, and the solution of crude metabolites was collected, diluted to 2 mL with 0.1 % formic acid in deionized water and analyzed by ESI-TOF. A signal of the PG building block, NAG-NAM with pendant pentapeptide, was observed with control experiments shown in Figure S10. The presence of this fragment supported our hypothesis during design of synthetic route, that our polymeric substrate **9** had an overall alternating NAM-NAG pattern. The resultant structure is similar to that found from natural bacterial cell wall, which is assembled from Lipid II.

**Figure S15** | ESI-TOF analysis of (a) the crude enzyme buffer and (b) phospholipid in buffer. The spectrum of signal at 1 min (c) matched with tetradecanyl phosphate under different ionization and fragmentation pattern. The protocol for LCMS was the same as the lysozyme degraded PGOs.

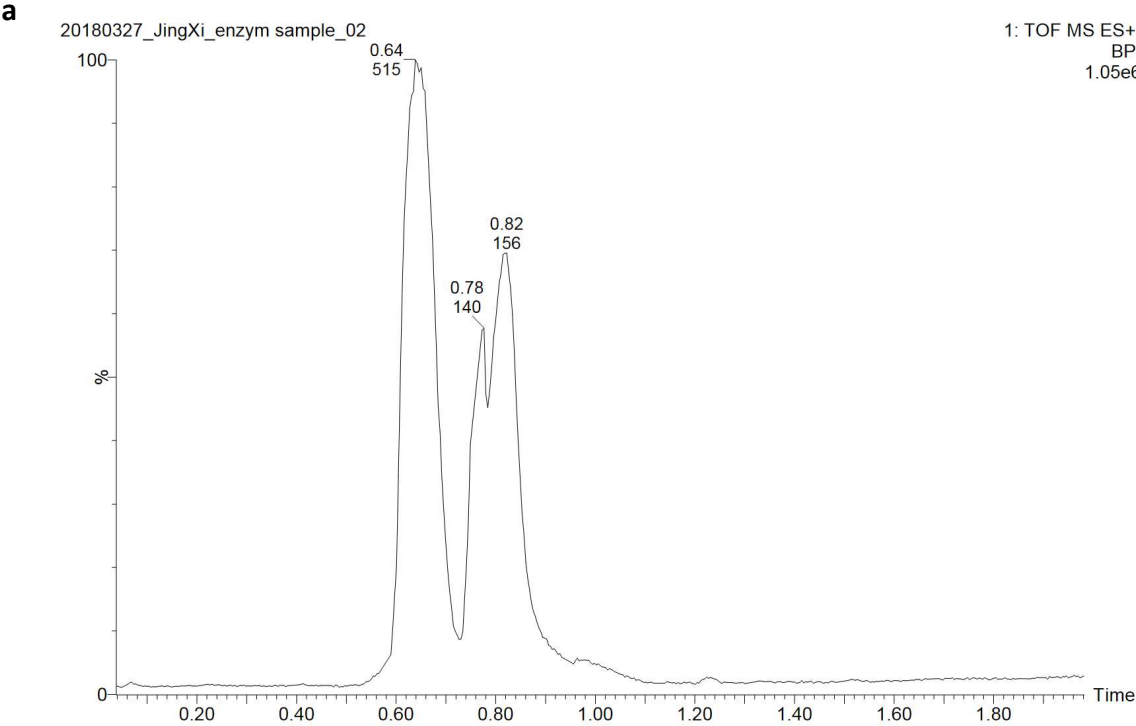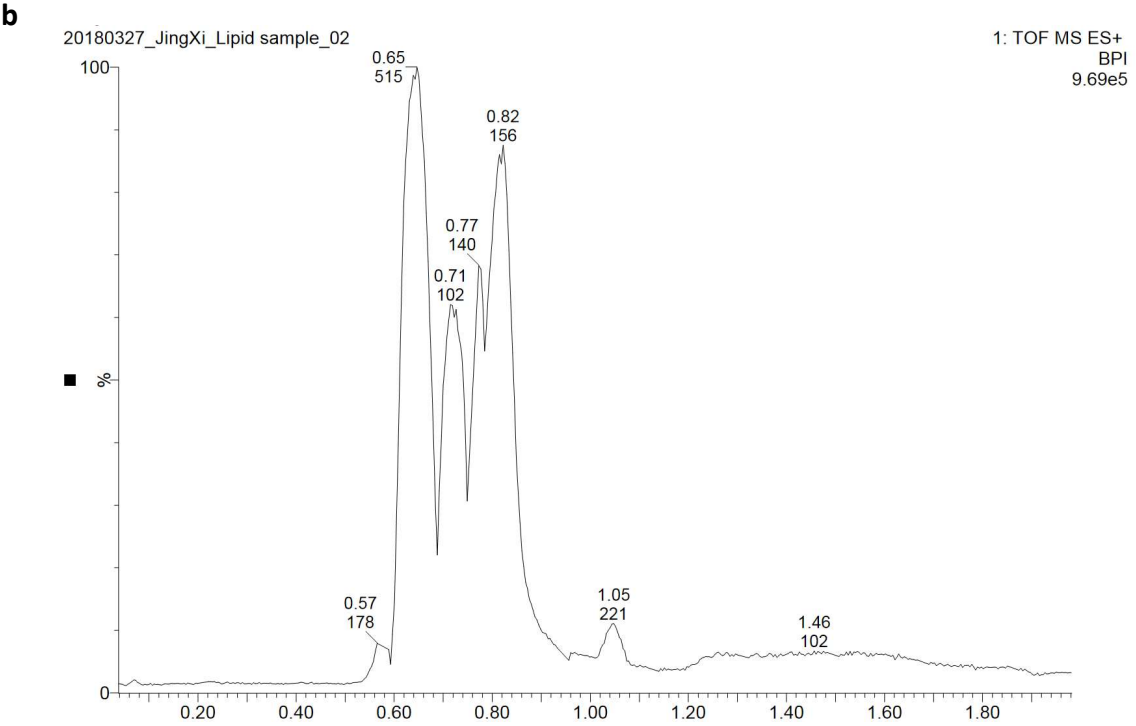

**C**

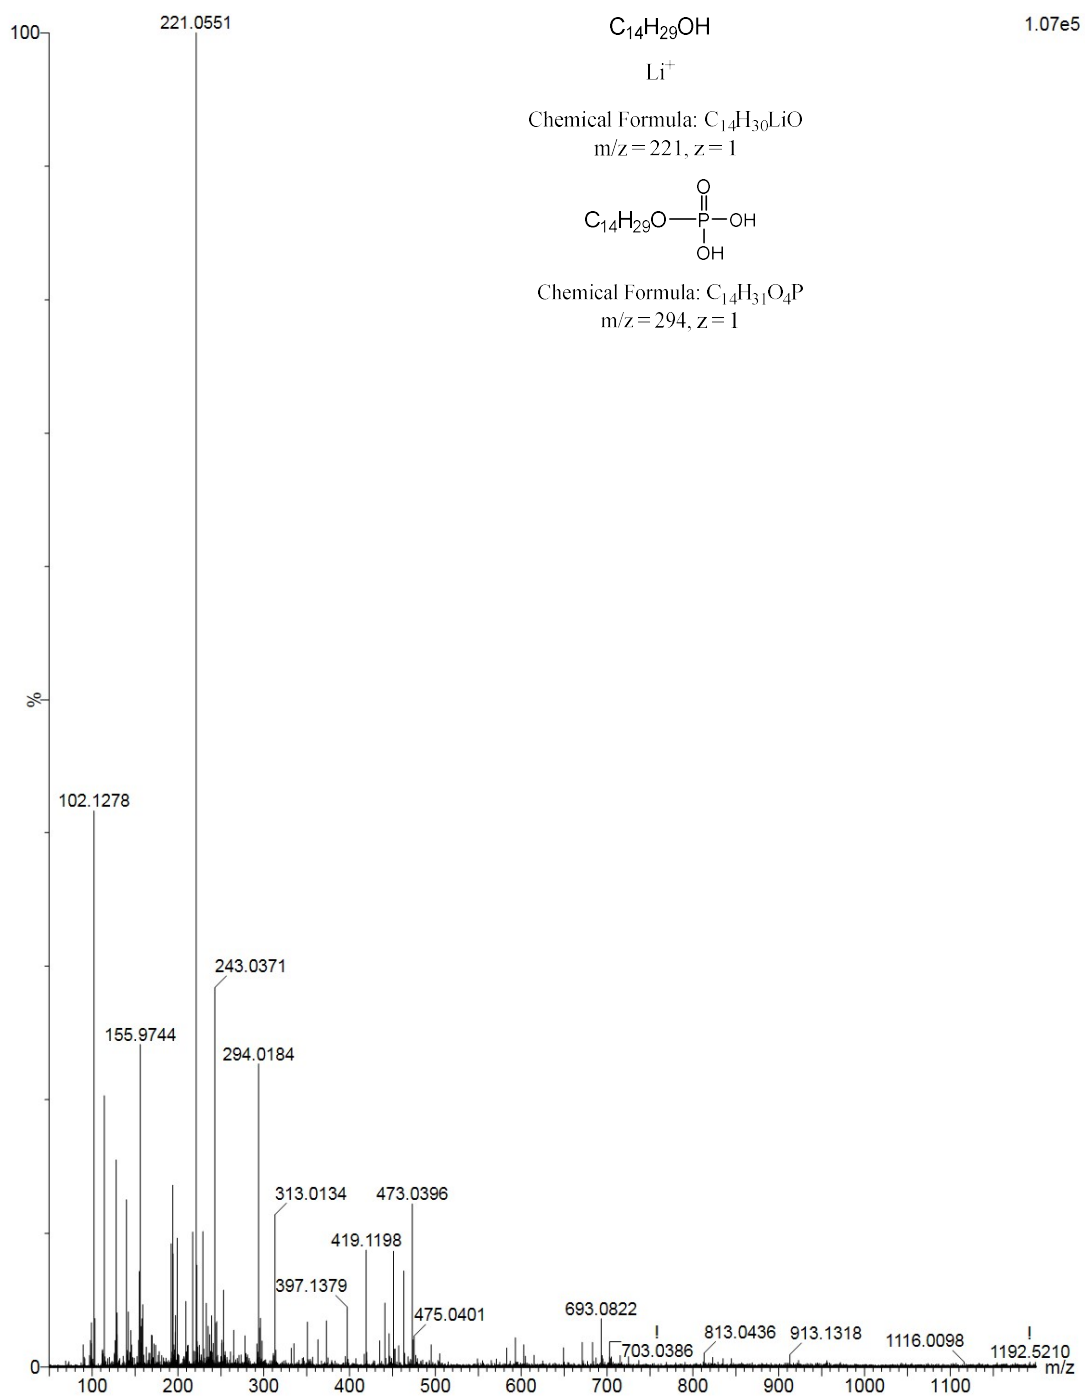

### **Stimulated Emission Depletion Microscopy (STED)**

To prepare samples for super resolution STED microscopy, overnight broth cultures were subsequently grown in 5 ml of fresh culture broth (1:100 dilution) to prepare logarithmic phase cultures after incubation at 37 °C for 4 hours in a shaking incubator (225 rpm). Then, bacteria cells were pelleted by centrifugation at 1,500 X g for 5 min, suspended in culture media at a concentration of  $10^8$  CFU ml<sup>-1</sup> and incubated for 1 hour in the dark in the presence of 100 µg/mL of rhodamine-labeled derivative of **9** at 37 °C with agitation (225 rpm). Bacterial cells were next incubated with the membrane stain FM1-43FX (Life Technologies) at a final concentration of 5 µg/ml for 5 min, as suggested by the manufacturer, and subsequently washed three times with PBS and resuspended in a fixative solution of 2% paraformaldehyde in PBS (pH 7.0). Cells were fixed for 1 hour at 37 °C in a shaking incubator (225 rpm), washed three times in PBS and applied to a sterile glass bottom collagen coated dish (MatTek Corporation). STED super resolution microscopy was performed on a Leica TCS SP8 STED-3X microscope (Leica Microsystems, Wetzlar, Germany) at SingHealth Advanced Biomaging Core. 479 nm and 556 nm lasers were used for fluorescence excitation, while 660 nm STED laser was used for depletion. In order to achieve maximum lateral resolution, all images were acquired in 2D STED mode. Further image processing required deconvolution, which was done using Huygens Professional software (Scientific Volume Imaging, Hilversum, Netherlands). ImageJ was utilized for further image processing.



## **Preparation of L-form Enterococcus and TIRF Microscopy**

L-forms were generated using DM3 agar by modified methods from reported protocol.<sup>[6]</sup> DM3 medium consists of 1.2 % agar, 0.5 % Tryptone, 0.5 % yeast extract, 1 M Succinate(pH 7.3), 3.5 % K<sub>2</sub>HPO<sub>4</sub> and 1.5 % KH<sub>2</sub>PO<sub>4</sub>, 20% Glucose, 1 M MgCl<sub>2</sub> AND 2% BSA. Parental strain *E.faecalis* OG1RF was grown overnight at 37 °C in DM3 broth. 100 µL of an overnight culture was directly plated on DM3 agar plates supplemented with 200 µg/ml penicillin G. The plates were incubated at 37 °C. Small fried egg-like shaped colonies appeared after 5 days. The colonies were restreaked on DM3 agar with 200 µg/mL penicillin G for a few times to get pure colonies, and serial passaging of pure colonies in DM3 agar with decreasing penicillin G concentrations to generate stable L-forms. The stable L-forms were stored at -80 °C in 20 % glycerol.

Fluorescence microscopy was performed on Nikon TIRF microscope (Nikon instruments, NY, USA). BODIPY FL and sulforhodamine B were excited at 488 and 560 nm and emitted at 512 and 580 nm respectively. Three days old L-forms grown in DM3 broth was washed and incubated with 1µL of Polymyxin B or Boc-FL (1 mg/mL) and 2 µL substrate (2 mg/mL) for 30 min at 37 °C. After 30 min, cells were washed thrice with 1 mL of liquid DM3. The final pellet was suspended in 30 µL liquid DM3. 5 µL of cells were placed on poly-lysine coated slides and observed under TIRF microscope (Figure S16). Image processing was done using MetaMorph Microscopy Automation & Image Analysis Software (Photometrics, AZ, USA). ImageJ was utilized for further image processing.

For FRET studies, 488 nm laser was used for fluorescence excitation, while emissions from both BODIPY FL (512 nm) and sulforhodamine B (580 nm) were collected simultaneously.

Samples were photobleached with FRAP device using 561 nm laser for 1 second while fluorescence intensity was monitored for both channels for 100 seconds in total (Figure S17).

**Figure S16** | TIRF images and FRET results (a) Wild type and L-form cells of *E. faecalis* OG1RF grown in DM3 medium were incubated with PGOs-rhodamine and membrane dye Polymyxin B-BODIPY FL. Whereas wild type cell envelope demonstrated a comprehensible enhancement at septum compared to cell surface, only a few discrete spots of substrate binding were seen on the L-form surface. Scale bars, 1  $\mu\text{m}$  and 10  $\mu\text{m}$  for wild type and L-forms respectively. (b) Fluorescence intensity change of the two fluorophores during and after photobleaching. The alignment of change was marked with dashed lines in the combined graph.

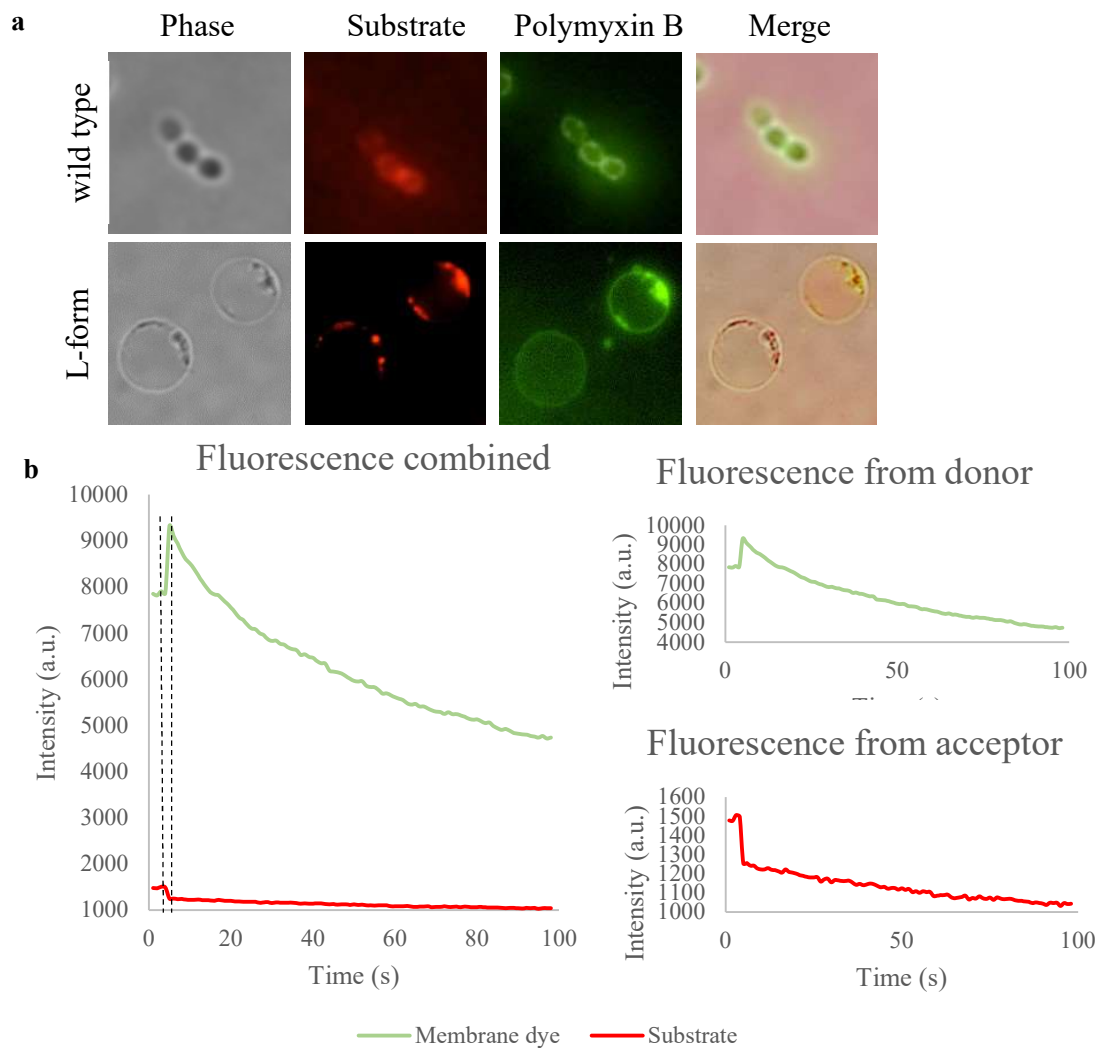

**Figure S17** | Schematic illustration of photobleaching process. White arrow marked the area illuminated by 561 nm laser and right panel showed the monitored fluorescence intensity change of Bodipy FL (top) and sulforhodamine B (bottom) respectively.

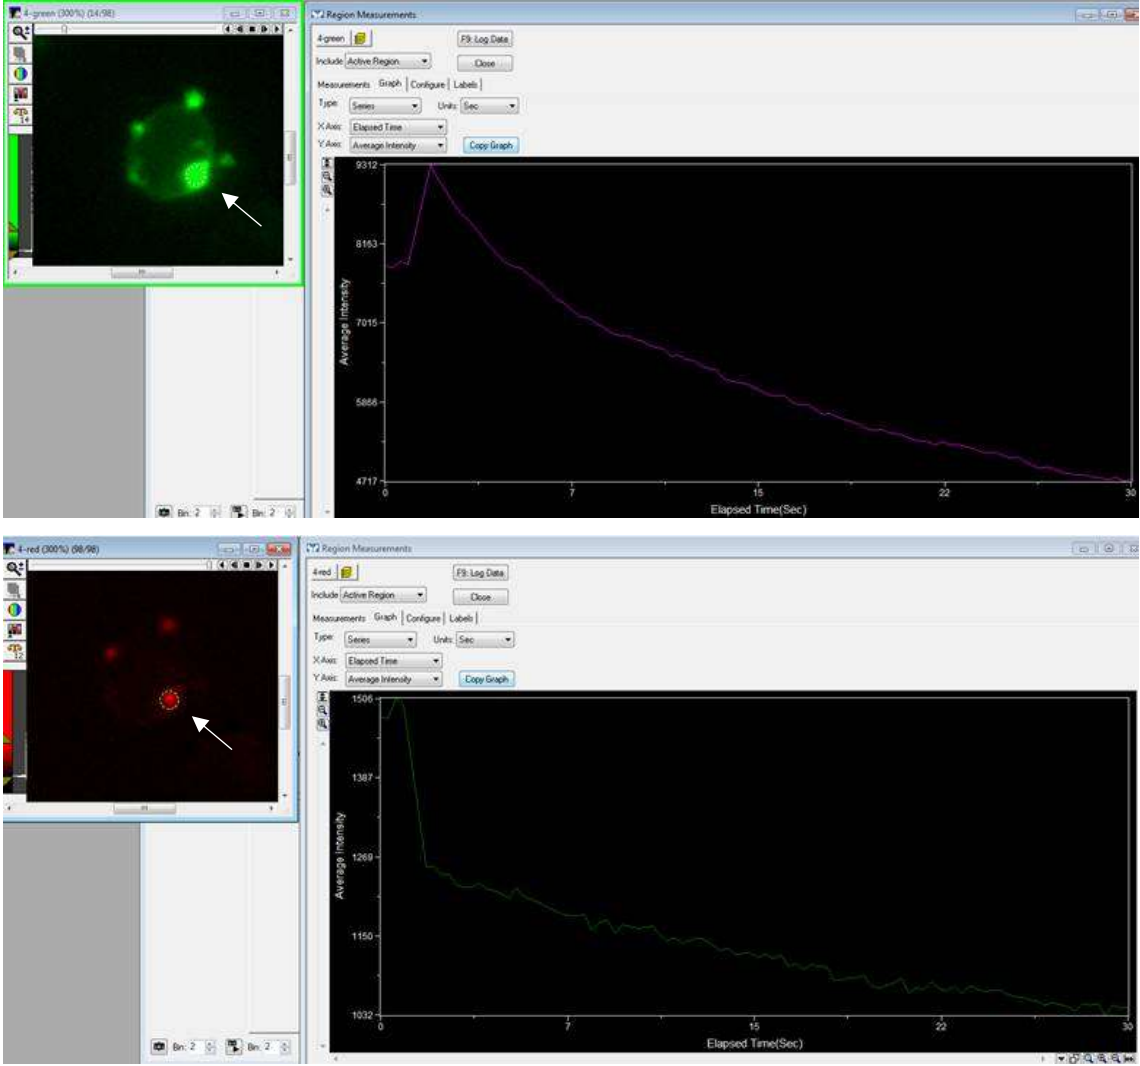

### Cryo-Transition Electron Microscopy (cryo-TEM)

To prepare samples for cryo-TEM, overnight TSB cultures were subsequently grown in 5 ml of fresh culture broth (1:100 dilution) to prepare logarithmic phase cultures after incubation at 37 °C for 4 hours in a shaking incubator (225 rpm). Then, *E. faecalis* bacteria cells were pelleted by centrifugation at 1,500 X g for 5 min, suspended in TSB culture media at a concentration of  $10^8$  CFU ml<sup>-1</sup> and incubated for 2 h in the dark in the presence of 1 mg/mL of PGOs-rhodamine at 37 °C with agitation (225 rpm). The cells were subsequently washed three times with PBS and frozen onto copper grid by liquid nitrogen. Cryo-TEM was performed using FEI Titan Krios (300kV, FEG, Falcon II direct detector, and Gatan Tridiem GIF with 2k x 2k post-GIF Gatan CCD) at NUS Centre for BioImaging Sciences. The images were taken at 14,000x magnification and processed subsequently by ImageJ.

**Figure S18** | Cryo-TEM images of *E. faecalis* sample, scale bar = 100 nm. Dark line represented cell membrane and white arrow marks where low density of PG was observed.

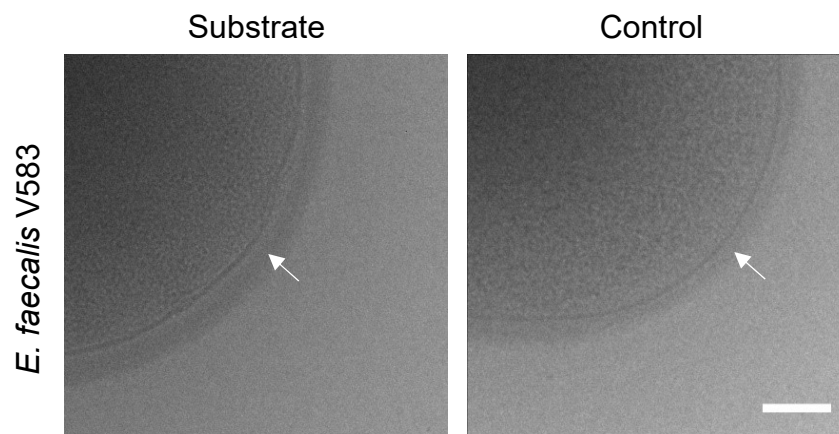

## Measurement of Fluorescence Intensity

Calculation was done using Fiji ImageJ according to the procedure reported by Burgess.<sup>[7]</sup> Both the laser power and STED power were kept constant throughout the experiments for the acquisition of the images for calculation purposes. To minimize crosstalk, the excitation wavelength of the red channel was set at 570 nm, with the emission photons collected from 580 nm to 620 nm. Only the cells that were in focus were taken into account for calculation, and the channels of the images (not processed by deconvolution) were split prior to calculation; calculating only those from the red channel. The area with fluorescence on each bacterial cell surface was drawn (see image below) and the total intensity was normalized by the number of pixels found in the area (mean). A total of hundred or more cells per bacterial strain were computed, and the average was taken for comparison.

**Figure S19** | Schematic illustration of intensity calculation method. Only the surface part of bacterial cells was measured to compare the amount of substrate incorporated onto cell wall.

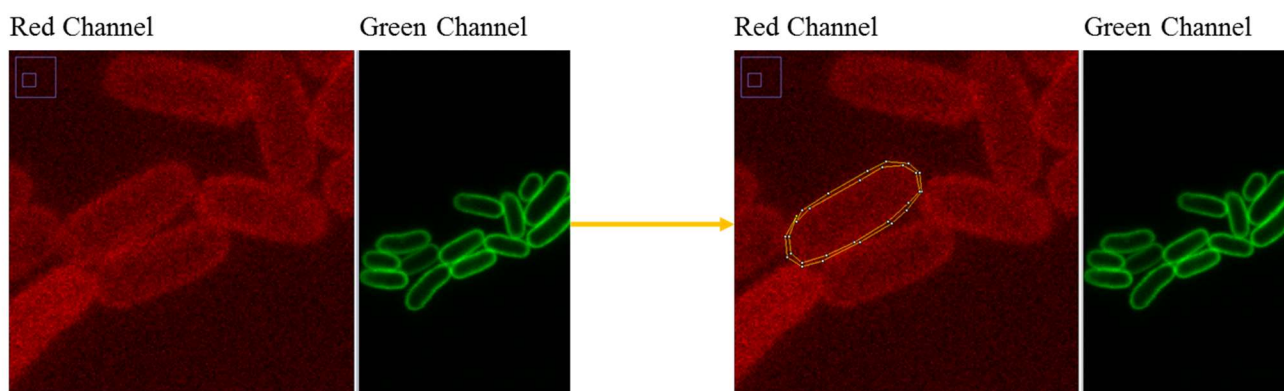

The images used for intensity calculation are listed below:

**Figure S20** | Images of *P. aeruginosa* O1 used for calculation

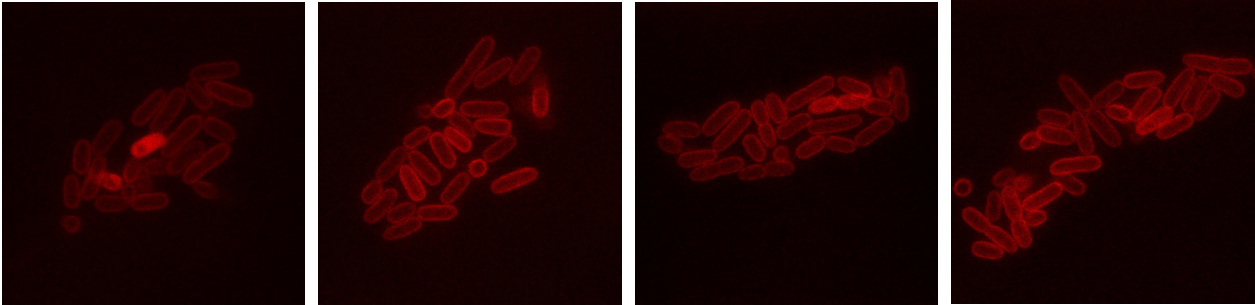

**Figure S21** | Images of *E. coli* K12 used for calculation

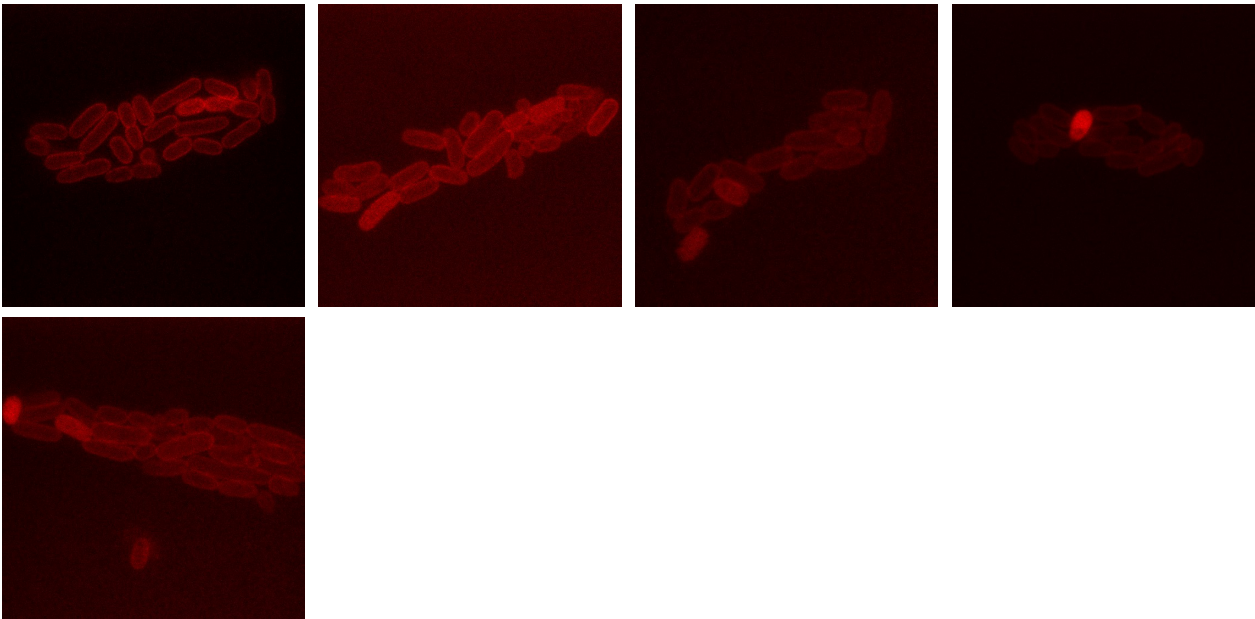

**Figure S22** | Images of *B. subtilis* 6633 used for calculation

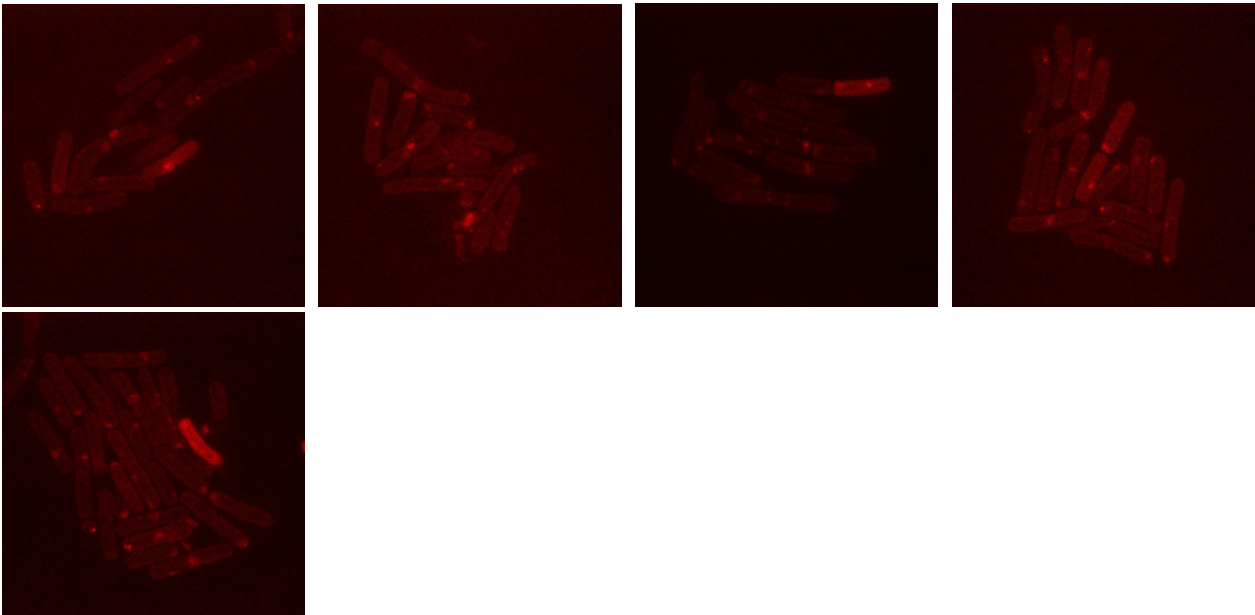

**Figure S23** | Images of *E. faecalis* V583 used for calculation

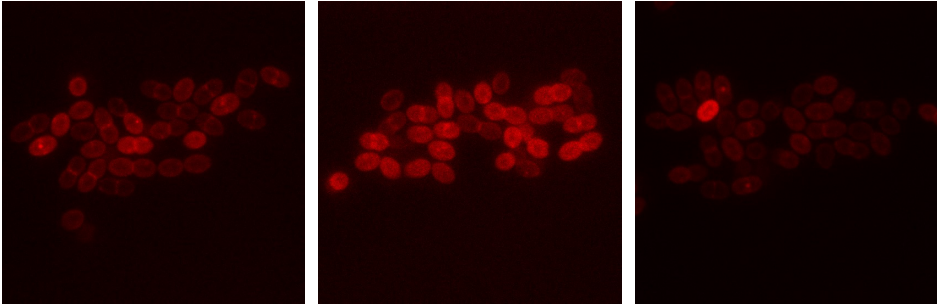

**Figure S24** | Images of *S. aureus* BAA40 used for calculation

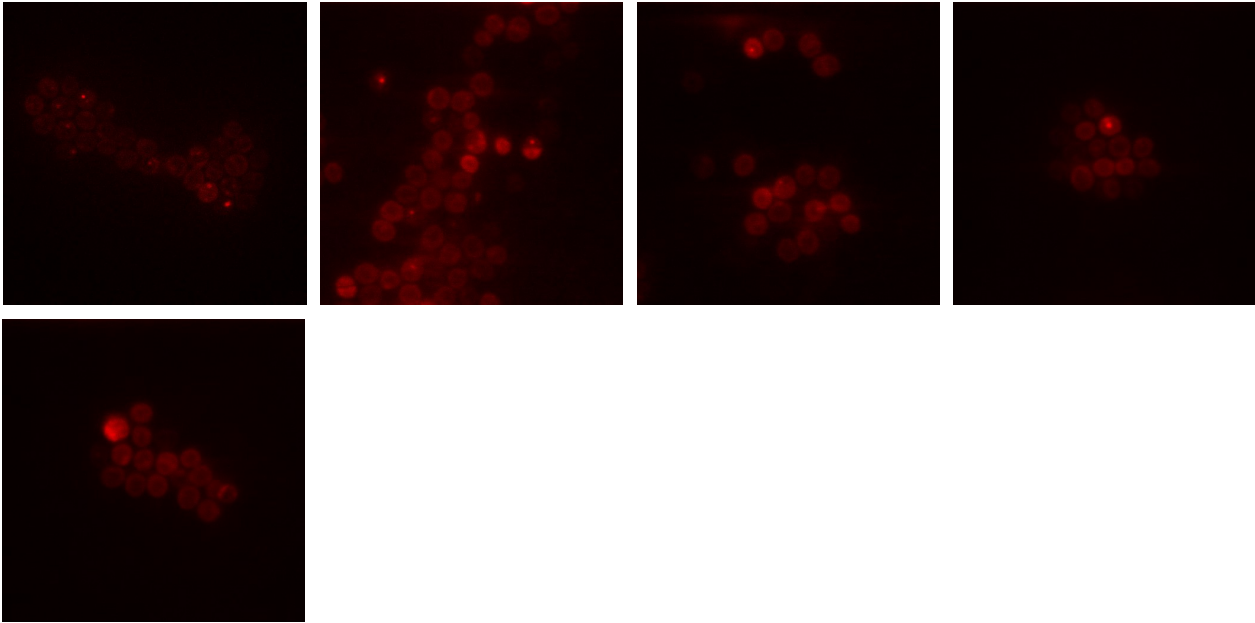

**Figure S25** | Images of *S. aureus* USA300 used for calculation

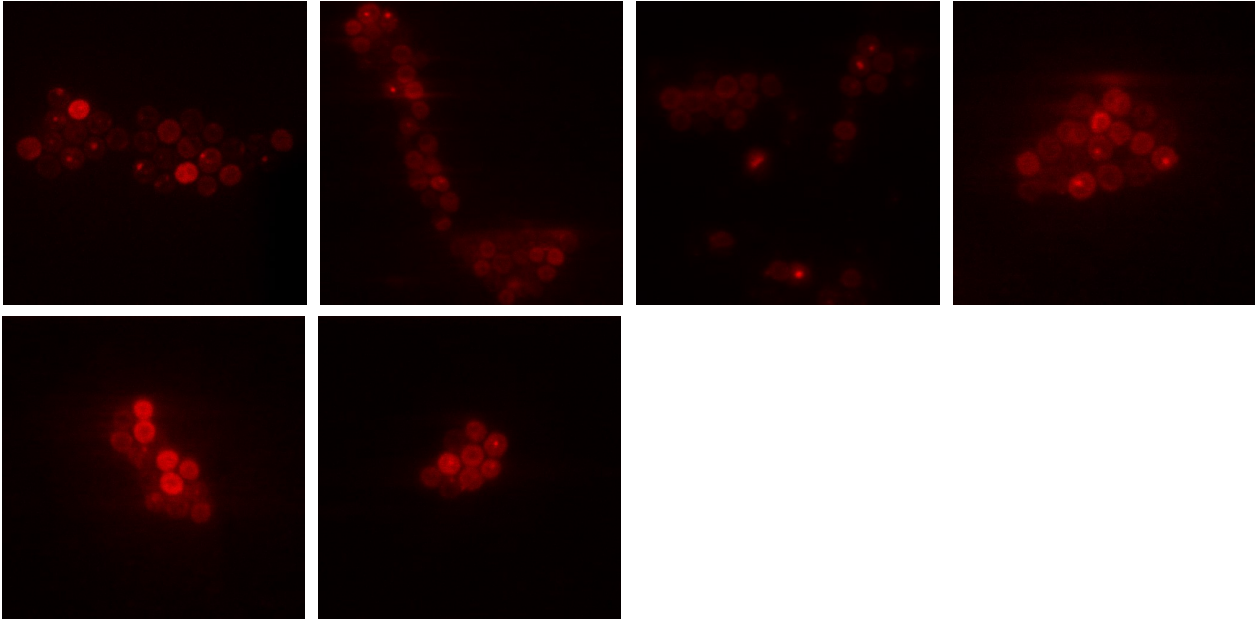

Table used for computation is shown as follows:

**Table S1 | Intensity of *P. aeruginosa* O1 (au) and area normalization**

| <i>PA01</i>        |    | Red Channel |        |        |           | <i>PA01</i>        |    | Red Channel |        |        |           |
|--------------------|----|-------------|--------|--------|-----------|--------------------|----|-------------|--------|--------|-----------|
| Series01           |    | Area        | Mean   | IntDen | RawIntDen | Series02           |    | Area        | Mean   | IntDen | RawIntDen |
| Cell               | 1  | 0.1         | 17.618 | 1.758  | 2537      | Cell               | 1  | 0.175       | 17.793 | 3.11   | 3861      |
|                    | 2  | 0.207       | 17.759 | 3.68   | 5310      |                    | 2  | 0.228       | 16.76  | 3.82   | 4743      |
|                    | 3  | 0.203       | 20.034 | 4.068  | 5870      |                    | 3  | 0.198       | 17.467 | 3.461  | 4297      |
|                    | 4  | 0.215       | 15.823 | 3.399  | 4905      |                    | 4  | 0.255       | 16.237 | 4.146  | 5147      |
|                    | 5  | 0.247       | 23.298 | 5.748  | 8294      |                    | 5  | 0.23        | 20.561 | 4.72   | 5860      |
|                    | 6  | 0.104       | 31.387 | 3.263  | 4708      |                    | 6  | 0.242       | 24.711 | 5.991  | 7438      |
|                    | 7  | 0.204       | 18.337 | 3.736  | 5391      |                    | 7  | 0.228       | 14.314 | 3.263  | 4051      |
|                    | 8  | 0.211       | 20.489 | 4.331  | 6249      |                    | 8  | 0.176       | 19.128 | 3.359  | 4170      |
|                    | 9  | 0.108       | 22.481 | 2.43   | 3507      |                    | 9  | 0.231       | 23.118 | 5.344  | 6635      |
|                    | 10 | 0.109       | 17.57  | 1.924  | 2776      |                    | 10 | 0.215       | 20.449 | 4.398  | 5460      |
|                    | 11 | 0.101       | 24.644 | 2.493  | 3598      |                    | 11 | 0.193       | 18.803 | 3.62   | 4494      |
|                    | 12 | 0.111       | 18.594 | 2.062  | 2975      |                    | 12 | 0.147       | 26.098 | 3.847  | 4776      |
|                    | 13 | 0.216       | 37.01  | 8.002  | 11547     |                    | 13 | 0.201       | 26.333 | 5.282  | 6557      |
|                    | 14 | 0.259       | 19.021 | 4.93   | 7114      |                    | 14 | 0.203       | 19.175 | 3.892  | 4832      |
|                    | 15 | 0.261       | 19.78  | 5.168  | 7457      |                    | 15 | 0.165       | 25.776 | 4.256  | 5284      |
|                    | 16 | 0.26        | 20.237 | 5.259  | 7589      |                    | 16 | 0.437       | 15.994 | 6.996  | 8685      |
|                    | 17 | 0.198       | 16.839 | 3.326  | 4799      |                    | 17 | 0.255       | 15.64  | 3.994  | 4958      |
|                    | 18 | 0.291       | 20.343 | 5.921  | 8544      |                    | 18 | 0.238       | 14.24  | 3.395  | 4215      |
|                    | 19 | 0.1         | 18.278 | 1.824  | 2632      |                    | 19 | 0.159       | 23.645 | 3.752  | 4658      |
|                    | 20 | 0.179       | 18.236 | 3.261  | 4705      |                    | 20 | 0.264       | 19.009 | 5.022  | 6235      |
|                    | 21 | 0.169       | 18.697 | 3.161  | 4562      |                    | 21 | 0.222       | 22.764 | 5.061  | 6283      |
|                    | 22 | 0.264       | 15.302 | 4.04   | 5830      |                    | 22 | 0.238       | 16.537 | 3.943  | 4895      |
|                    | 23 | 0.268       | 21.398 | 5.739  | 8281      |                    | 23 | 0.263       | 21.483 | 5.659  | 7025      |
| Avg (-background): |    | 14.63372609 |        |        |           | Avg (-background): |    | 15.7658087  |        |        |           |
| Std Dev:           |    | 4.917777026 |        |        |           | Std Dev:           |    | 3.801236171 |        |        |           |
| Std Error:         |    | 1.025427395 |        |        |           | Std Error:         |    | 0.792612533 |        |        |           |
| BG                 | 1  | 0.115       | 5.446  | 0.626  | 904       | BG                 | 1  | 0.184       | 4.259  | 0.782  | 971       |
|                    | 2  | 0.15        | 6.088  | 0.911  | 1315      |                    | 2  | 0.184       | 4.158  | 0.764  | 948       |
|                    | 3  | 0.15        | 5.958  | 0.892  | 1287      |                    | 3  | 0.184       | 4.224  | 0.776  | 963       |
|                    | 4  | 0.15        | 5.875  | 0.879  | 1269      |                    | 4  | 0.184       | 3.833  | 0.704  | 874       |
|                    | 5  | 0.15        | 5.764  | 0.863  | 1245      |                    | 5  | 0.184       | 4.096  | 0.752  | 934       |
|                    | 6  | 0.15        | 6.144  | 0.92   | 1327      |                    | 6  | 0.184       | 3.706  | 0.681  | 845       |
|                    | 7  | 0.15        | 6.736  | 1.008  | 1455      |                    | 7  | 0.184       | 3.75   | 0.689  | 855       |
|                    | 8  | 0.15        | 5.472  | 0.819  | 1182      |                    | 8  | 0.184       | 3.895  | 0.715  | 888       |
|                    | 9  | 0.15        | 6.491  | 0.972  | 1402      |                    | 9  | 0.184       | 4.368  | 0.802  | 996       |
|                    | 10 | 0.15        | 5.417  | 0.811  | 1170      |                    | 10 | 0.184       | 4.329  | 0.795  | 987       |
| Avg:               |    | 5.9391      |        |        |           | Avg:               |    | 4.0618      |        |        |           |

| <i>PA01</i> |  | Red Channel |      |        |           | <i>PA01</i> |  | Red Channel |      |        |           |
|-------------|--|-------------|------|--------|-----------|-------------|--|-------------|------|--------|-----------|
| Series03    |  | Area        | Mean | IntDen | RawIntDen | Series04    |  | Area        | Mean | IntDen | RawIntDen |



|                    |    |             |        |       |      |
|--------------------|----|-------------|--------|-------|------|
| Cell               | 1  | 0.234       | 13.341 | 3.116 | 3869 |
|                    | 2  | 0.202       | 12.554 | 2.538 | 3151 |
|                    | 3  | 0.244       | 16.089 | 3.927 | 4875 |
|                    | 4  | 0.284       | 15.127 | 4.301 | 5340 |
|                    | 5  | 0.303       | 17.019 | 5.154 | 6399 |
|                    | 6  | 0.241       | 17     | 4.094 | 5083 |
|                    | 7  | 0.266       | 20.185 | 5.365 | 6661 |
|                    | 8  | 0.183       | 17.916 | 3.276 | 4067 |
|                    | 9  | 0.184       | 14.43  | 2.65  | 3290 |
|                    | 10 | 0.174       | 14.685 | 2.555 | 3172 |
|                    | 11 | 0.138       | 17.409 | 2.398 | 2977 |
|                    | 12 | 0.22        | 17.597 | 3.87  | 4804 |
|                    | 13 | 0.214       | 18.729 | 4.013 | 4982 |
|                    | 14 | 0.286       | 18.563 | 5.308 | 6590 |
|                    | 15 | 0.177       | 24.923 | 4.417 | 5483 |
|                    | 16 | 0.291       | 16.277 | 4.733 | 5876 |
|                    | 17 | 0.208       | 18.229 | 3.788 | 4703 |
|                    | 18 | 0.215       | 15.569 | 3.348 | 4157 |
|                    | 19 | 0.268       | 14.694 | 3.941 | 4893 |
|                    | 20 | 0.18        | 20.359 | 3.657 | 4540 |
|                    | 21 | 0.205       | 22.392 | 4.599 | 5710 |
|                    | 22 | 0.16        | 18     | 2.885 | 3582 |
|                    | 23 | 0.172       | 15.014 | 2.588 | 3213 |
|                    | 24 | 0.171       | 13.778 | 2.353 | 2921 |
| Avg (-background): |    | 14.65429167 |        |       |      |
| Std Dev:           |    | 2.905052009 |        |       |      |
| Std Error:         |    | 0.592991258 |        |       |      |
| BG                 | 1  | 0.155       | 2.651  | 0.41  | 509  |
|                    | 2  | 0.155       | 2.812  | 0.435 | 540  |
|                    | 3  | 0.155       | 2.516  | 0.389 | 483  |
|                    | 4  | 0.155       | 1.917  | 0.296 | 368  |
|                    | 5  | 0.155       | 2.609  | 0.404 | 501  |
|                    | 6  | 0.155       | 2.365  | 0.366 | 454  |
|                    | 7  | 0.155       | 1.958  | 0.303 | 376  |
|                    | 8  | 0.155       | 2.448  | 0.379 | 470  |
|                    | 9  | 0.155       | 2.25   | 0.348 | 432  |
|                    | 10 | 0.155       | 2.714  | 0.42  | 521  |
| Avg:               |    | 2.424       |        |       |      |
|                    |    |             |        |       |      |
| Cell               | 1  | 0.21        | 17.18  | 3.612 | 4484 |
|                    | 2  | 0.304       | 16.889 | 5.142 | 6384 |
|                    | 3  | 0.219       | 16.757 | 3.671 | 4558 |
|                    | 4  | 0.221       | 16.011 | 3.534 | 4387 |
|                    | 5  | 0.241       | 16.803 | 4.047 | 5024 |
|                    | 6  | 0.258       | 17.328 | 4.467 | 5545 |
|                    | 7  | 0.239       | 20.502 | 4.905 | 6089 |
|                    | 8  | 0.221       | 23.026 | 5.082 | 6309 |
|                    | 9  | 0.259       | 20.131 | 5.205 | 6462 |
|                    | 10 | 0.241       | 18.97  | 4.569 | 5672 |
|                    | 11 | 0.226       | 14.256 | 3.227 | 4006 |
|                    | 12 | 0.126       | 21.75  | 2.733 | 3393 |
|                    | 13 | 0.255       | 14.633 | 3.725 | 4624 |
|                    | 14 | 0.257       | 12.856 | 3.303 | 4101 |
|                    | 15 | 0.244       | 15.31  | 3.737 | 4639 |
|                    | 16 | 0.184       | 15.576 | 2.873 | 3567 |
|                    | 17 | 0.214       | 19.733 | 4.228 | 5249 |
|                    | 18 | 0.158       | 22.209 | 3.506 | 4353 |
|                    | 19 | 0.271       | 21.507 | 5.838 | 7248 |
|                    | 20 | 0.198       | 17.089 | 3.386 | 4204 |
|                    | 21 | 0.277       | 23.608 | 6.541 | 8121 |
|                    | 22 | 0.143       | 21.921 | 3.143 | 3902 |
|                    | 23 | 0.18        | 20.987 | 3.787 | 4701 |
|                    | 24 | 0.207       | 21.381 | 4.426 | 5495 |
|                    | 25 | 0.121       | 14.053 | 1.698 | 2108 |
|                    | 26 | 0.168       | 14.76  | 2.473 | 3070 |
|                    | 27 | 0.11        | 17.577 | 1.94  | 2408 |
|                    | 28 | 0.166       | 19.223 | 3.19  | 3960 |
|                    | 29 | 0.178       | 20.113 | 3.58  | 4445 |
|                    | 30 | 0.184       | 19.332 | 3.566 | 4427 |
| Avg (-background): |    | 15.23216667 |        |       |      |
| Std Dev:           |    | 2.970623231 |        |       |      |
| Std Error:         |    | 0.542359118 |        |       |      |
| BG                 | 1  | 0.143       | 2.74   | 0.391 | 485  |
|                    | 2  | 0.143       | 3.056  | 0.436 | 541  |
|                    | 3  | 0.143       | 3.531  | 0.503 | 625  |
|                    | 4  | 0.143       | 3.209  | 0.458 | 568  |
|                    | 5  | 0.143       | 3.215  | 0.458 | 569  |
|                    | 6  | 0.143       | 3.395  | 0.484 | 601  |
|                    | 7  | 0.143       | 3.316  | 0.473 | 587  |
|                    | 8  | 0.143       | 2.944  | 0.42  | 521  |
|                    | 9  | 0.143       | 2.825  | 0.403 | 500  |
|                    | 10 | 0.143       | 3.271  | 0.466 | 579  |



| <i>E. coli</i> K-12 |    | Red Channel |        |        |           |
|---------------------|----|-------------|--------|--------|-----------|
| Series03            |    | Area        | Mean   | IntDen | RawIntDen |
| Cell                | 1  | 0.25        | 25.895 | 6.478  | 9348      |
|                     | 2  | 0.214       | 23.793 | 5.095  | 7352      |
|                     | 3  | 0.169       | 24.082 | 4.072  | 5876      |
|                     | 4  | 0.126       | 29.571 | 3.73   | 5382      |
|                     | 5  | 0.272       | 26.407 | 7.192  | 10378     |
|                     | 6  | 0.253       | 26.753 | 6.767  | 9765      |
|                     | 7  | 0.258       | 28.199 | 7.269  | 10490     |
|                     | 8  | 0.216       | 25.763 | 5.57   | 8038      |
|                     | 9  | 0.22        | 25.899 | 5.707  | 8236      |
|                     | 10 | 0.235       | 26.785 | 6.292  | 9080      |
|                     | 11 | 0.195       | 31.655 | 6.164  | 8895      |
|                     | 12 | 0.179       | 24.209 | 4.328  | 6246      |
|                     | 13 | 0.245       | 26.89  | 6.597  | 9519      |
|                     | 14 | 0.2         | 23.436 | 4.694  | 6773      |
|                     | 15 | 0.192       | 25.56  | 4.906  | 7080      |
|                     | 16 | 0.222       | 26.75  | 5.932  | 8560      |
| Avg (-background):  |    | 12.9667375  |        |        |           |
| Std Dev:            |    | 2.14288679  |        |        |           |
| Std Error:          |    | 0.535721698 |        |        |           |
| BG                  | 1  | 0.292       | 13.176 | 3.844  | 5547      |
|                     | 2  | 0.292       | 13.102 | 3.823  | 5516      |
|                     | 3  | 0.292       | 13.622 | 3.974  | 5735      |
|                     | 4  | 0.292       | 13.822 | 4.033  | 5819      |
|                     | 5  | 0.292       | 14.107 | 4.116  | 5939      |
|                     | 6  | 0.292       | 12.9   | 3.764  | 5431      |
|                     | 7  | 0.292       | 13.031 | 3.802  | 5486      |
|                     | 8  | 0.292       | 13.249 | 3.866  | 5578      |
|                     | 9  | 0.292       | 13.43  | 3.918  | 5654      |
|                     | 10 | 0.292       | 13.423 | 3.916  | 5651      |
| Avg:                |    | 13.3862     |        |        |           |

| <i>E. coli</i> K-12 |    | Red Channel |        |        |           |
|---------------------|----|-------------|--------|--------|-----------|
| Series04            |    | Area        | Mean   | IntDen | RawIntDen |
| Cell                | 1  | 0.213       | 23.642 | 5.03   | 7258      |
|                     | 2  | 0.193       | 25.273 | 4.869  | 7026      |
|                     | 3  | 0.15        | 26.602 | 3.982  | 5746      |
|                     | 4  | 0.252       | 27.755 | 7.001  | 10103     |
|                     | 5  | 0.199       | 28.296 | 5.628  | 8121      |
|                     | 6  | 0.252       | 54.959 | 13.825 | 19950     |
|                     | 7  | 0.21        | 27.554 | 5.786  | 8349      |
|                     | 8  | 0.227       | 27.341 | 6.215  | 8968      |
|                     | 9  | 0.262       | 29.235 | 7.658  | 11051     |
|                     | 10 | 0.172       | 25.419 | 4.369  | 6304      |
|                     | 11 | 0.188       | 26.812 | 5.035  | 7266      |
|                     | 12 | 0.239       | 24.435 | 5.842  | 8430      |
|                     | 13 | 0.191       | 24.58  | 4.701  | 6784      |
|                     | 14 | 0.191       | 29.855 | 5.71   | 8240      |
|                     | 15 | 0.281       | 26.202 | 7.354  | 10612     |
|                     | 16 | 0.108       | 32.455 | 3.509  | 5063      |
|                     | 17 | 0.157       | 25.257 | 3.956  | 5708      |
| Avg (-background):  |    | 17.16754118 |        |        |           |
| Std Dev:            |    | 7.152348718 |        |        |           |
| Std Error:          |    | 1.734699367 |        |        |           |
| BG                  | 1  | 0.277       | 11.14  | 3.088  | 4456      |
|                     | 2  | 0.277       | 11.307 | 3.134  | 4523      |
|                     | 3  | 0.277       | 11.812 | 3.274  | 4725      |
|                     | 4  | 0.277       | 11.273 | 3.125  | 4509      |
|                     | 5  | 0.277       | 11.322 | 3.139  | 4529      |
|                     | 6  | 0.277       | 11.39  | 3.157  | 4556      |
|                     | 7  | 0.277       | 11.367 | 3.151  | 4547      |
|                     | 8  | 0.277       | 11.393 | 3.158  | 4557      |
|                     | 9  | 0.277       | 11.758 | 3.259  | 4703      |
|                     | 10 | 0.277       | 11.252 | 3.119  | 4501      |
| Avg:                |    | 11.4014     |        |        |           |

| <i>E. coli</i> K-12 |   | Red Channel |        |        |           |
|---------------------|---|-------------|--------|--------|-----------|
| Series05            |   | Area        | Mean   | IntDen | RawIntDen |
| Cell                | 1 | 0.216       | 31.788 | 6.873  | 9918      |
|                     | 2 | 0.229       | 25.109 | 5.759  | 8311      |
|                     | 3 | 0.261       | 23.691 | 6.173  | 8908      |
|                     | 4 | 0.243       | 23.889 | 5.811  | 8385      |
|                     | 5 | 0.23        | 35.084 | 8.072  | 11648     |
|                     | 6 | 0.213       | 22.623 | 4.829  | 6968      |
|                     | 7 | 0.168       | 25.252 | 4.235  | 6111      |

|                    |    |       |             |       |       |
|--------------------|----|-------|-------------|-------|-------|
|                    | 8  | 0.164 | 24.92       | 4.093 | 5906  |
|                    | 9  | 0.306 | 30.893      | 9.441 | 13624 |
|                    | 10 | 0.277 | 28.018      | 7.747 | 11179 |
|                    | 11 | 0.139 | 27.463      | 3.825 | 5520  |
|                    | 12 | 0.168 | 26.453      | 4.455 | 6428  |
|                    | 13 | 0.294 | 28.854      | 8.478 | 12234 |
|                    | 14 | 0.164 | 25.844      | 4.245 | 6125  |
|                    | 15 | 0.109 | 24.49       | 2.665 | 3845  |
|                    | 16 | 0.157 | 27.132      | 4.268 | 6159  |
|                    | 17 | 0.201 | 26.121      | 5.249 | 7575  |
|                    | 18 | 0.161 | 27.515      | 4.443 | 6411  |
|                    | 19 | 0.35  | 26.794      | 9.377 | 13531 |
|                    | 20 | 0.175 | 26.818      | 4.702 | 6785  |
|                    | 21 | 0.202 | 24.712      | 5.001 | 7216  |
|                    | 22 | 0.091 | 20.364      | 1.863 | 2688  |
|                    | 23 | 0.158 | 25.009      | 3.951 | 5702  |
|                    | 24 | 0.233 | 29.622      | 6.897 | 9953  |
|                    | 25 | 0.087 | 24.736      | 2.143 | 3092  |
|                    | 26 | 0.335 | 26.377      | 8.829 | 12740 |
|                    | 27 | 0.169 | 26.287      | 4.445 | 6414  |
| Avg (-background): |    |       | 13.29215926 |       |       |
| Std Dev:           |    |       | 2.95911578  |       |       |
| Std Error:         |    |       | 0.569482097 |       |       |
| BG                 | 1  | 0.265 | 11.527      | 3.06  | 4415  |
|                    | 2  | 0.265 | 13.337      | 3.54  | 5108  |
|                    | 3  | 0.265 | 13.358      | 3.545 | 5116  |
|                    | 4  | 0.265 | 14.713      | 3.905 | 5635  |
|                    | 5  | 0.265 | 13.389      | 3.554 | 5128  |
|                    | 6  | 0.265 | 14.616      | 3.879 | 5598  |
|                    | 7  | 0.265 | 13.984      | 3.712 | 5356  |
|                    | 8  | 0.265 | 11.911      | 3.161 | 4562  |
|                    | 9  | 0.265 | 12.433      | 3.3   | 4762  |
|                    | 10 | 0.265 | 12.943      | 3.435 | 4957  |
| Avg:               |    |       | 13.2211     |       |       |

**Table S3 | Intensity of *B. subtilis* 6633 (au) and area normalization**

| <i>B. subtilis</i> 6633 |      | Red Channel |        |           |          | <i>B. subtilis</i> 6633 |      | Red Channel |           |       |      |
|-------------------------|------|-------------|--------|-----------|----------|-------------------------|------|-------------|-----------|-------|------|
| Series01                | Area | Mean        | IntDen | RawIntDen | Series02 | Area                    | Mean | IntDen      | RawIntDen |       |      |
| Cell                    | 1    | 0.267       | 12.033 | 3.208     | 3983     | Cell                    | 1    | 0.34        | 13.239    | 4.495 | 6487 |
|                         | 2    | 0.493       | 11.538 | 5.688     | 7061     |                         | 2    | 0.336       | 14.682    | 4.935 | 7121 |
|                         | 3    | 0.383       | 12.412 | 4.759     | 5908     |                         | 3    | 0.363       | 14.635    | 5.315 | 7669 |
|                         | 4    | 0.243       | 11.358 | 2.763     | 3430     |                         | 4    | 0.387       | 13.806    | 5.339 | 7704 |
|                         | 5    | 0.352       | 14.471 | 5.094     | 6324     |                         | 5    | 0.301       | 12.938    | 3.9   | 5628 |

|                    |                    |             |             |       |       |      |
|--------------------|--------------------|-------------|-------------|-------|-------|------|
|                    | 6                  | 0.268       | 11.282      | 3.026 | 3757  |      |
|                    | 7                  | 0.282       | 16.123      | 4.545 | 5643  |      |
|                    | 8                  | 0.242       | 12.814      | 3.107 | 3857  |      |
|                    | 9                  | 0.425       | 20.4        | 8.676 | 10771 |      |
|                    | 10                 | 0.43        | 14.455      | 6.218 | 7719  |      |
|                    | 11                 | 0.424       | 14.072      | 5.974 | 7416  |      |
|                    | 12                 | 0.415       | 16.355      | 6.785 | 8423  |      |
|                    | 13                 | 0.292       | 15.096      | 4.414 | 5480  |      |
|                    | 14                 | 0.435       | 12.622      | 5.49  | 6816  |      |
| Avg (-background): |                    | 7.091285714 |             |       |       |      |
| Std Dev:           |                    | 2.522312681 |             |       |       |      |
| Std Error:         |                    | 0.674116419 |             |       |       |      |
| BG                 | 1                  | 0.184       | 7.855       | 1.443 | 1791  |      |
|                    | 2                  | 0.184       | 6.908       | 1.269 | 1575  |      |
|                    | 3                  | 0.184       | 6.864       | 1.261 | 1565  |      |
|                    | 4                  | 0.184       | 6.553       | 1.203 | 1494  |      |
|                    | 5                  | 0.184       | 6.009       | 1.104 | 1370  |      |
|                    | 6                  | 0.184       | 6.842       | 1.257 | 1560  |      |
|                    | 7                  | 0.184       | 7.004       | 1.286 | 1597  |      |
|                    | 8                  | 0.184       | 7.044       | 1.294 | 1606  |      |
|                    | 9                  | 0.184       | 6.702       | 1.231 | 1528  |      |
|                    | 10                 | 0.184       | 6.614       | 1.215 | 1508  |      |
| Avg:               |                    | 6.8395      |             |       |       |      |
|                    |                    |             |             |       |       |      |
|                    | 6                  | 0.277       | 14.148      | 3.922 | 5659  |      |
|                    | 7                  | 0.27        | 13.841      | 3.741 | 5398  |      |
|                    | 8                  | 0.282       | 18.002      | 5.078 | 7327  |      |
|                    | 9                  | 0.305       | 13.152      | 4.01  | 5787  |      |
|                    | 10                 | 0.29        | 14.048      | 4.079 | 5886  |      |
|                    | 11                 | 0.271       | 13.169      | 3.568 | 5149  |      |
|                    | 12                 | 0.76        | 12.55       | 9.54  | 13767 |      |
|                    | 13                 | 0.483       | 14.861      | 7.178 | 10358 |      |
|                    | 14                 | 0.431       | 13.638      | 5.879 | 8483  |      |
|                    | 15                 | 0.306       | 12.548      | 3.843 | 5546  |      |
|                    | Avg (-background): |             | 9.938566667 |       |       |      |
|                    | Std Dev:           |             | 1.339895351 |       |       |      |
|                    | Std Error:         |             | 0.345959492 |       |       |      |
|                    | BG                 | 1           | 0.496       | 3.486 | 1.73  | 2496 |
|                    |                    | 2           | 0.399       | 4.082 | 1.629 | 2351 |
| 3                  |                    | 0.496       | 4.043       | 2.006 | 2895  |      |
| 4                  |                    | 0.496       | 3.722       | 1.847 | 2665  |      |
| 5                  |                    | 0.496       | 3.966       | 1.968 | 2840  |      |
| 6                  |                    | 0.496       | 3.711       | 1.841 | 2657  |      |
| 7                  |                    | 0.496       | 4.383       | 2.175 | 3138  |      |
| 8                  |                    | 0.496       | 4.413       | 2.19  | 3160  |      |
| 9                  |                    | 0.496       | 4.439       | 2.202 | 3178  |      |
| 10                 |                    | 0.496       | 3.874       | 1.922 | 2774  |      |
| Avg:               |                    | 4.0119      |             |       |       |      |

| <i>B. subtilis</i> 6633 |    | Red Channel |        |        |           |
|-------------------------|----|-------------|--------|--------|-----------|
| Series03                |    | Area        | Mean   | IntDen | RawIntDen |
| Cell                    | 1  | 0.325       | 10.631 | 3.455  | 4986      |
|                         | 2  | 0.292       | 11.423 | 3.333  | 4809      |
|                         | 3  | 0.247       | 11.317 | 2.8    | 4040      |
|                         | 4  | 0.34        | 13.573 | 4.609  | 6651      |
|                         | 5  | 0.356       | 11.207 | 3.984  | 5749      |
|                         | 6  | 0.367       | 13.885 | 5.1    | 7359      |
|                         | 7  | 0.311       | 13.488 | 4.197  | 6056      |
|                         | 8  | 0.347       | 14.467 | 5.023  | 7248      |
|                         | 9  | 0.331       | 16.207 | 5.369  | 7747      |
|                         | 10 | 0.318       | 13.322 | 4.238  | 6115      |
|                         | 11 | 0.39        | 14.943 | 5.83   | 8413      |
|                         | 12 | 0.394       | 15.023 | 5.924  | 8548      |
|                         | 13 | 0.568       | 13.532 | 7.68   | 11083     |
|                         | 14 | 0.325       | 12.141 | 3.946  | 5694      |
|                         | 15 | 0.358       | 12.01  | 4.294  | 6197      |
|                         | 16 | 0.339       | 12.951 | 4.389  | 6333      |

  

| <i>B. subtilis</i> 6633 |    | Red Channel |        |        |           |
|-------------------------|----|-------------|--------|--------|-----------|
| Series04                |    | Area        | Mean   | IntDen | RawIntDen |
| Cell                    | 1  | 0.371       | 11.35  | 4.208  | 6072      |
|                         | 2  | 0.36        | 10.398 | 3.747  | 5407      |
|                         | 3  | 0.358       | 12.198 | 4.362  | 6294      |
|                         | 4  | 0.34        | 11.996 | 4.082  | 5890      |
|                         | 5  | 0.346       | 15.006 | 5.189  | 7488      |
|                         | 6  | 0.362       | 13.125 | 4.748  | 6851      |
|                         | 7  | 0.444       | 13.752 | 6.099  | 8801      |
|                         | 8  | 0.405       | 15.259 | 6.175  | 8911      |
|                         | 9  | 0.696       | 11.228 | 7.812  | 11273     |
|                         | 10 | 0.615       | 11.717 | 7.202  | 10393     |
|                         | 11 | 0.322       | 14.049 | 4.527  | 6533      |
|                         | 12 | 0.369       | 15.146 | 5.595  | 8073      |
|                         | 13 | 0.358       | 17.872 | 6.391  | 9222      |
|                         | 14 | 0.359       | 17.11  | 6.142  | 8863      |
|                         | 15 | 0.313       | 13.721 | 4.298  | 6202      |
|                         | 16 | 0.408       | 14.217 | 5.803  | 8374      |

|                    |    |             |        |       |       |                    |    |             |        |       |      |
|--------------------|----|-------------|--------|-------|-------|--------------------|----|-------------|--------|-------|------|
|                    | 17 | 0.344       | 14.546 | 5     | 7215  |                    | 17 | 0.369       | 14.403 | 5.32  | 7677 |
|                    | 18 | 0.352       | 20.398 | 7.181 | 10362 |                    | 18 | 0.312       | 12.738 | 3.972 | 5732 |
| Avg (-background): |    | 8.160666667 |        |       |       |                    | 19 | 0.332       | 14.781 | 4.906 | 7080 |
| Std Dev:           |    | 2.278128489 |        |       |       |                    | 20 | 0.383       | 14.043 | 5.372 | 7752 |
| Std Error:         |    | 0.536960034 |        |       |       |                    | 21 | 0.368       | 11.842 | 4.358 | 6288 |
| BG                 | 1  | 0.277       | 5.505  | 1.526 | 2202  |                    | 22 | 0.311       | 12.038 | 3.746 | 5405 |
|                    | 2  | 0.277       | 5.555  | 1.54  | 2222  |                    | 23 | 0.321       | 11.227 | 3.602 | 5198 |
|                    | 3  | 0.277       | 5.598  | 1.552 | 2239  |                    | 24 | 0.321       | 14.205 | 4.558 | 6577 |
|                    | 4  | 0.139       | 5.285  | 0.732 | 1057  |                    | 25 | 0.332       | 13.843 | 4.595 | 6631 |
|                    | 5  | 0.182       | 5.198  | 0.947 | 1367  | Avg (-background): |    | 7.91946     |        |       |      |
|                    | 6  | 0.08        | 5.207  | 0.419 | 604   | Std Dev:           |    | 1.846469832 |        |       |      |
|                    | 7  | 0.277       | 5.218  | 1.446 | 2087  | Std Error:         |    | 0.369293966 |        |       |      |
|                    | 8  | 0.277       | 5.65   | 1.566 | 2260  | BG                 | 1  | 0.4         | 5.53   | 2.211 | 3191 |
|                    | 9  | 0.277       | 5.695  | 1.579 | 2278  |                    | 2  | 0.4         | 5.558  | 2.222 | 3207 |
|                    | 10 | 0.153       | 5.629  | 0.862 | 1244  |                    | 3  | 0.4         | 5.575  | 2.229 | 3217 |
| Avg:               |    | 5.454       |        |       |       |                    | 4  | 0.4         | 5.47   | 2.187 | 3156 |
|                    |    |             |        |       |       |                    | 5  | 0.4         | 5.53   | 2.211 | 3191 |
|                    |    |             |        |       |       |                    | 6  | 0.4         | 5.66   | 2.263 | 3266 |
|                    |    |             |        |       |       |                    | 7  | 0.4         | 5.636  | 2.254 | 3252 |
|                    |    |             |        |       |       |                    | 8  | 0.4         | 5.461  | 2.184 | 3151 |
|                    |    |             |        |       |       |                    | 9  | 0.4         | 5.65   | 2.259 | 3260 |
|                    |    |             |        |       |       |                    | 10 | 0.4         | 5.641  | 2.256 | 3255 |
|                    |    |             |        |       |       | Avg:               |    | 5.5711      |        |       |      |

| <i>B. subtilis</i> 6633 |    | Red Channel |        |        |           |
|-------------------------|----|-------------|--------|--------|-----------|
| Series05                |    | Area        | Mean   | IntDen | RawIntDen |
| Cell                    | 1  | 0.485       | 10.52  | 5.103  | 7364      |
|                         | 2  | 0.451       | 10.625 | 4.793  | 6917      |
|                         | 3  | 0.353       | 12.006 | 4.243  | 6123      |
|                         | 4  | 0.421       | 9.758  | 4.112  | 5933      |
|                         | 5  | 0.109       | 15.614 | 1.71   | 2467      |
|                         | 6  | 0.623       | 10.046 | 6.258  | 9031      |
|                         | 7  | 0.446       | 11.616 | 5.176  | 7469      |
|                         | 8  | 0.45        | 10.963 | 4.938  | 7126      |
|                         | 9  | 0.57        | 12.062 | 6.871  | 9915      |
|                         | 10 | 0.407       | 13.032 | 5.31   | 7663      |
|                         | 11 | 0.397       | 14.262 | 5.663  | 8172      |
|                         | 12 | 0.398       | 13.471 | 5.368  | 7746      |
|                         | 13 | 0.477       | 12.168 | 5.81   | 8384      |
|                         | 14 | 0.536       | 15.658 | 8.388  | 12104     |
|                         | 15 | 0.388       | 11.421 | 4.432  | 6396      |
|                         | 16 | 0.374       | 13.978 | 5.221  | 7534      |
|                         | 17 | 0.369       | 14.133 | 5.22   | 7533      |

|                    |    |             |        |        |       |
|--------------------|----|-------------|--------|--------|-------|
|                    | 18 | 0.332       | 12.432 | 4.127  | 5955  |
|                    | 19 | 0.344       | 11.133 | 3.834  | 5533  |
|                    | 20 | 0.374       | 11.223 | 4.192  | 6049  |
|                    | 21 | 0.383       | 12.031 | 4.602  | 6641  |
|                    | 22 | 0.346       | 11.94  | 4.137  | 5970  |
|                    | 23 | 0.374       | 14.409 | 5.392  | 7781  |
|                    | 24 | 0.488       | 12.224 | 5.964  | 8606  |
|                    | 25 | 0.34        | 12.163 | 4.13   | 5960  |
|                    | 26 | 0.36        | 13.452 | 4.847  | 6995  |
|                    | 27 | 0.441       | 12.625 | 5.573  | 8042  |
|                    | 28 | 0.36        | 11.046 | 3.973  | 5733  |
|                    | 29 | 0.376       | 12.853 | 4.836  | 6979  |
|                    | 30 | 0.537       | 12.406 | 6.663  | 9615  |
|                    | 31 | 0.509       | 23.74  | 12.075 | 17425 |
|                    | 32 | 0.214       | 10.084 | 2.159  | 3116  |
|                    | 33 | 0.183       | 10.583 | 1.936  | 2794  |
| Avg (-background): |    | 7.444172727 |        |        |       |
| Std Dev:           |    | 2.507908258 |        |        |       |
| Std Error:         |    | 0.436570791 |        |        |       |
| BG                 | 1  | 0.218       | 5.362  | 1.17   | 1689  |
|                    | 2  | 0.218       | 4.978  | 1.087  | 1568  |
|                    | 3  | 0.218       | 5.117  | 1.117  | 1612  |
|                    | 4  | 0.218       | 5.292  | 1.155  | 1667  |
|                    | 5  | 0.179       | 5.043  | 0.902  | 1301  |
|                    | 6  | 0.218       | 5.184  | 1.132  | 1633  |
|                    | 7  | 0.218       | 5.076  | 1.108  | 1599  |
|                    | 8  | 0.218       | 5.13   | 1.12   | 1616  |
|                    | 9  | 0.218       | 5.044  | 1.101  | 1589  |
|                    | 10 | 0.218       | 5.295  | 1.156  | 1668  |
| Avg:               |    | 5.1521      |        |        |       |

**Table S4 | Intensity of *E. faecalis* V583 (au) and area normalization**

| <i>E. faecalis</i> V583 |   |       | Red Channel |        |           | <i>E. faecalis</i> V583 |   |       | Red Channel |        |           |
|-------------------------|---|-------|-------------|--------|-----------|-------------------------|---|-------|-------------|--------|-----------|
| Series01                |   | Area  | Mean        | IntDen | RawIntDen | Series02                |   | Area  | Mean        | IntDen | RawIntDen |
| Cell                    | 1 | 0.311 | 28.245      | 8.789  | 12682     | Cell                    | 1 | 0.104 | 34.413      | 3.577  | 5162      |
|                         | 2 | 0.268 | 52.106      | 13.974 | 20165     |                         | 2 | 0.192 | 32.657      | 6.269  | 9046      |
|                         | 3 | 0.156 | 45.653      | 7.118  | 10272     |                         | 3 | 0.182 | 30.825      | 5.618  | 8107      |
|                         | 4 | 0.113 | 48.73       | 5.504  | 7943      |                         | 4 | 0.123 | 33.864      | 4.154  | 5994      |
|                         | 5 | 0.193 | 37.627      | 7.275  | 10498     |                         | 5 | 0.125 | 39.667      | 4.948  | 7140      |
|                         | 6 | 0.199 | 27.537      | 5.477  | 7903      |                         | 6 | 0.223 | 22.22       | 4.958  | 7155      |
|                         | 7 | 0.19  | 36.369      | 6.906  | 9965      |                         | 7 | 0.142 | 18.888      | 2.683  | 3872      |
|                         | 8 | 0.203 | 31.597      | 6.416  | 9258      |                         | 8 | 0.249 | 30.287      | 7.535  | 10873     |
|                         | 9 | 0.258 | 37.016      | 9.568  | 13807     |                         | 9 | 0.203 | 29.898      | 6.071  | 8760      |

|      |                    |        |             |        |       |    |    |       |        |       |       |  |        |  |  |  |  |  |  |  |  |
|------|--------------------|--------|-------------|--------|-------|----|----|-------|--------|-------|-------|--|--------|--|--|--|--|--|--|--|--|
|      | 10                 | 0.119  | 28.715      | 3.423  | 4939  |    | 10 | 0.157 | 27.379 | 4.307 | 6215  |  |        |  |  |  |  |  |  |  |  |
|      | 11                 | 0.277  | 23.609      | 6.528  | 9420  |    | 11 | 0.149 | 25.307 | 3.771 | 5441  |  |        |  |  |  |  |  |  |  |  |
|      | 12                 | 0.204  | 39.241      | 7.995  | 11537 |    | 12 | 0.211 | 34.397 | 7.27  | 10491 |  |        |  |  |  |  |  |  |  |  |
|      | 13                 | 0.29   | 39.038      | 11.335 | 16357 |    | 13 | 0.203 | 37.075 | 7.528 | 10863 |  |        |  |  |  |  |  |  |  |  |
|      | 14                 | 0.19   | 27.894      | 5.297  | 7643  |    | 14 | 0.125 | 35.21  | 4.416 | 6373  |  |        |  |  |  |  |  |  |  |  |
|      | 15                 | 0.177  | 47.762      | 8.473  | 12227 |    | 15 | 0.13  | 30.75  | 4.006 | 5781  |  |        |  |  |  |  |  |  |  |  |
|      | 16                 | 0.305  | 56.468      | 17.218 | 24846 |    | 16 | 0.155 | 24.567 | 3.814 | 5503  |  |        |  |  |  |  |  |  |  |  |
|      | 17                 | 0.178  | 32.008      | 5.701  | 8226  |    | 17 | 0.15  | 23.189 | 3.487 | 5032  |  |        |  |  |  |  |  |  |  |  |
|      | 18                 | 0.171  | 31.486      | 5.389  | 7777  |    | 18 | 0.144 | 23.091 | 3.328 | 4803  |  |        |  |  |  |  |  |  |  |  |
|      | 19                 | 0.185  | 30.165      | 5.581  | 8054  |    | 19 | 0.125 | 34.95  | 4.36  | 6291  |  |        |  |  |  |  |  |  |  |  |
|      | 20                 | 0.179  | 49.838      | 8.945  | 12908 |    | 20 | 0.139 | 33.194 | 4.624 | 6672  |  |        |  |  |  |  |  |  |  |  |
|      | 21                 | 0.105  | 28          | 2.949  | 4256  |    | 21 | 0.131 | 20.873 | 2.734 | 3945  |  |        |  |  |  |  |  |  |  |  |
|      | 22                 | 0.142  | 36.439      | 5.177  | 7470  |    | 22 | 0.143 | 35.246 | 5.056 | 7296  |  |        |  |  |  |  |  |  |  |  |
|      | 23                 | 0.281  | 26.569      | 7.475  | 10787 |    | 23 | 0.151 | 39.904 | 6.028 | 8699  |  |        |  |  |  |  |  |  |  |  |
|      | 24                 | 0.161  | 27.082      | 4.354  | 6283  |    | 24 | 0.108 | 31.981 | 3.457 | 4989  |  |        |  |  |  |  |  |  |  |  |
|      | 25                 | 0.151  | 29.202      | 4.412  | 6366  |    | 25 | 0.102 | 21.898 | 2.231 | 3219  |  |        |  |  |  |  |  |  |  |  |
|      | 26                 | 0.195  | 34.408      | 6.724  | 9703  |    | 26 | 0.119 | 37.07  | 4.393 | 6339  |  |        |  |  |  |  |  |  |  |  |
|      | 27                 | 0.278  | 29.741      | 8.265  | 11926 |    | 27 | 0.15  | 30.281 | 4.554 | 6571  |  |        |  |  |  |  |  |  |  |  |
|      | 28                 | 0.221  | 31.614      | 6.989  | 10085 |    | 28 | 0.257 | 36.779 | 9.456 | 13645 |  |        |  |  |  |  |  |  |  |  |
|      | 29                 | 0.245  | 46.824      | 11.454 | 16529 |    | 29 | 0.184 | 19.545 | 3.603 | 5199  |  |        |  |  |  |  |  |  |  |  |
|      | 30                 | 0.261  | 28.215      | 7.352  | 10609 |    | 30 | 0.172 | 17.395 | 2.99  | 4314  |  |        |  |  |  |  |  |  |  |  |
|      | 31                 | 0.264  | 34.625      | 9.142  | 13192 |    | 31 | 0.164 | 27.161 | 4.442 | 6410  |  |        |  |  |  |  |  |  |  |  |
|      | 32                 | 0.266  | 26.557      | 7.067  | 10198 |    | 32 | 0.269 | 33.75  | 9.075 | 13095 |  |        |  |  |  |  |  |  |  |  |
|      | Avg (-background): |        | 26.066875   |        |       |    |    |       |        |       |       |  |        |  |  |  |  |  |  |  |  |
|      | Std Dev:           |        | 8.75256418  |        |       |    |    |       |        |       |       |  |        |  |  |  |  |  |  |  |  |
|      | Std Error:         |        | 1.547249371 |        |       |    |    |       |        |       |       |  |        |  |  |  |  |  |  |  |  |
| BG   | 1                  | 0.123  | 8.847       | 1.085  | 1566  | BG | 1  | 0.218 | 7.359  | 1.606 | 2318  |  |        |  |  |  |  |  |  |  |  |
|      | 2                  | 0.123  | 9.514       | 1.167  | 1684  |    | 2  | 0.218 | 7.238  | 1.58  | 2280  |  |        |  |  |  |  |  |  |  |  |
|      | 3                  | 0.123  | 9.723       | 1.193  | 1721  |    | 3  | 0.218 | 6.721  | 1.467 | 2117  |  |        |  |  |  |  |  |  |  |  |
|      | 4                  | 0.123  | 9.35        | 1.147  | 1655  |    | 4  | 0.218 | 6.781  | 1.48  | 2136  |  |        |  |  |  |  |  |  |  |  |
|      | 5                  | 0.123  | 8.932       | 1.096  | 1581  |    | 5  | 0.218 | 7.349  | 1.604 | 2315  |  |        |  |  |  |  |  |  |  |  |
|      | 6                  | 0.123  | 9.475       | 1.162  | 1677  |    | 6  | 0.218 | 8.273  | 1.806 | 2606  |  |        |  |  |  |  |  |  |  |  |
|      | 7                  | 0.123  | 8.542       | 1.048  | 1512  |    | 7  | 0.218 | 7.679  | 1.676 | 2419  |  |        |  |  |  |  |  |  |  |  |
|      | 8                  | 0.123  | 9.305       | 1.141  | 1647  |    | 8  | 0.218 | 6.159  | 1.344 | 1940  |  |        |  |  |  |  |  |  |  |  |
|      | 9                  | 0.123  | 9.175       | 1.125  | 1624  |    | 9  | 0.218 | 6.949  | 1.517 | 2189  |  |        |  |  |  |  |  |  |  |  |
|      | 10                 | 0.123  | 9.712       | 1.191  | 1719  |    | 10 | 0.218 | 6.311  | 1.378 | 1988  |  |        |  |  |  |  |  |  |  |  |
| Avg: |                    | 9.2575 |             |        |       |    |    |       |        |       | Avg:  |  | 7.0819 |  |  |  |  |  |  |  |  |

| <i>E. faecalis</i> V583 |  |      | Red Channel |        |           |
|-------------------------|--|------|-------------|--------|-----------|
| Series03                |  | Area | Mean        | IntDen | RawIntDen |



|                    |    |             |        |        |       |
|--------------------|----|-------------|--------|--------|-------|
| Cell               | 1  | 0.146       | 29.474 | 4.31   | 6219  |
|                    | 2  | 0.155       | 33.272 | 5.165  | 7453  |
|                    | 3  | 0.182       | 32.416 | 5.886  | 8493  |
|                    | 4  | 0.103       | 37.765 | 3.899  | 5627  |
|                    | 5  | 0.1         | 39.965 | 3.988  | 5755  |
|                    | 6  | 0.174       | 75.45  | 13.124 | 18938 |
|                    | 7  | 0.122       | 42.705 | 5.209  | 7516  |
|                    | 8  | 0.119       | 43.907 | 5.233  | 7552  |
|                    | 9  | 0.123       | 33.904 | 4.159  | 6001  |
|                    | 10 | 0.141       | 39.642 | 5.604  | 8087  |
|                    | 11 | 0.1         | 30.959 | 3.111  | 4489  |
|                    | 12 | 0.098       | 31.606 | 3.11   | 4488  |
|                    | 13 | 0.128       | 36.027 | 4.619  | 6665  |
|                    | 14 | 0.177       | 24.867 | 4.394  | 6341  |
|                    | 15 | 0.172       | 37.161 | 6.387  | 9216  |
|                    | 16 | 0.118       | 28.782 | 3.391  | 4893  |
|                    | 17 | 0.092       | 41.797 | 3.852  | 5559  |
|                    | 18 | 0.097       | 40.643 | 3.943  | 5690  |
|                    | 19 | 0.137       | 37.707 | 5.174  | 7466  |
|                    | 20 | 0.105       | 30.311 | 3.172  | 4577  |
|                    | 21 | 0.144       | 34.106 | 4.916  | 7094  |
|                    | 22 | 0.135       | 43.631 | 5.896  | 8508  |
|                    | 23 | 0.114       | 34.878 | 3.964  | 5720  |
|                    | 24 | 0.114       | 23.994 | 2.727  | 3935  |
|                    | 25 | 0.101       | 34.466 | 3.487  | 5032  |
|                    | 26 | 0.125       | 37.171 | 4.662  | 6728  |
|                    | 27 | 0.187       | 39.963 | 7.477  | 10790 |
|                    | 28 | 0.141       | 26.814 | 3.791  | 5470  |
|                    | 29 | 0.146       | 36.281 | 5.28   | 7619  |
|                    | 30 | 0.139       | 34.91  | 4.863  | 7017  |
|                    | 31 | 0.152       | 34.909 | 5.298  | 7645  |
|                    | 32 | 0.139       | 24.285 | 3.366  | 4857  |
|                    | 33 | 0.146       | 24.576 | 3.577  | 5161  |
|                    | 34 | 0.13        | 32.25  | 4.202  | 6063  |
|                    | 35 | 0.112       | 29.571 | 3.299  | 4761  |
|                    | 36 | 0.128       | 29.076 | 3.708  | 5350  |
|                    | 37 | 0.127       | 22.568 | 2.862  | 4130  |
|                    | 38 | 0.106       | 22.471 | 2.383  | 3438  |
|                    | 39 | 0.104       | 39.353 | 4.091  | 5903  |
| Avg (-background): |    | 27.35383846 |        |        |       |
| Std Dev:           |    | 8.988189762 |        |        |       |
| Std Error:         |    | 1.439262233 |        |        |       |
| BG                 | 1  | 0.132       | 7.479  | 0.985  | 1421  |

|  |      |       |        |       |      |
|--|------|-------|--------|-------|------|
|  | 2    | 0.132 | 6.795  | 0.895 | 1291 |
|  | 3    | 0.132 | 7.737  | 1.019 | 1470 |
|  | 4    | 0.132 | 7.205  | 0.949 | 1369 |
|  | 5    | 0.132 | 7.205  | 0.949 | 1369 |
|  | 6    | 0.132 | 7.753  | 1.021 | 1473 |
|  | 7    | 0.132 | 7.805  | 1.028 | 1483 |
|  | 8    | 0.132 | 6.937  | 0.913 | 1318 |
|  | 9    | 0.1   | 7.347  | 0.733 | 1058 |
|  | 10   | 0.132 | 7.284  | 0.959 | 1384 |
|  | Avg: |       | 7.3547 |       |      |

**Table S5 | Intensity of *S. aureus* BAA40 and USA300 (au) and area normalization**

| MRSA-BAA40 |    |       | Red Channel |        |           | MRSA-BAA40 |    |       | Red Channel |        |           |
|------------|----|-------|-------------|--------|-----------|------------|----|-------|-------------|--------|-----------|
| Series01   |    | Area  | Mean        | IntDen | RawIntDen | Series02   |    | Area  | Mean        | IntDen | RawIntDen |
| Cell       | 1  | 0.452 | 16.765      | 7.576  | 9405      | Cell       | 1  | 0.115 | 22.933      | 2.648  | 5137      |
|            | 2  | 0.349 | 23.573      | 8.222  | 10207     |            | 2  | 0.211 | 22.954      | 4.84   | 9388      |
|            | 3  | 0.349 | 35.206      | 12.279 | 15244     |            | 3  | 0.106 | 22.834      | 2.413  | 4681      |
|            | 4  | 0.349 | 28.739      | 10.024 | 12444     |            | 4  | 0.081 | 21.108      | 1.708  | 3314      |
|            | 5  | 0.349 | 27.746      | 9.677  | 12014     |            | 5  | 0.132 | 23.191      | 3.061  | 5937      |
|            | 6  | 0.349 | 22.506      | 7.85   | 9745      |            | 6  | 0.171 | 25.885      | 4.417  | 8568      |
|            | 7  | 0.349 | 32.478      | 11.328 | 14063     |            | 7  | 0.125 | 28.124      | 3.509  | 6806      |
|            | 8  | 0.349 | 26.956      | 9.402  | 11672     |            | 8  | 0.126 | 21.657      | 2.735  | 5306      |
|            | 9  | 0.349 | 18.501      | 6.453  | 8011      |            | 9  | 0.101 | 27.658      | 2.795  | 5421      |
|            | 10 | 0.349 | 30.166      | 10.521 | 13062     |            | 10 | 0.125 | 24.252      | 3.026  | 5869      |
|            | 11 | 0.349 | 23.882      | 8.33   | 10341     |            | 11 | 0.206 | 37.902      | 7.796  | 15123     |
|            | 12 | 0.349 | 18.975      | 6.618  | 8216      |            | 12 | 0.084 | 36.871      | 3.098  | 6010      |
|            | 13 | 0.349 | 24.134      | 8.417  | 10450     |            | 13 | 0.174 | 31.855      | 5.551  | 10767     |
|            | 14 | 0.349 | 23.781      | 8.294  | 10297     |            | 14 | 0.115 | 24.621      | 2.843  | 5515      |
|            | 15 | 0.349 | 33.704      | 11.755 | 14594     |            | 15 | 0.123 | 37.017      | 4.542  | 8810      |
|            | 16 | 0.349 | 26.575      | 9.269  | 11507     |            | 16 | 0.113 | 24.068      | 2.73   | 5295      |
|            | 17 | 0.349 | 39.744      | 13.862 | 17209     |            | 17 | 0.087 | 22.13       | 1.928  | 3740      |
|            | 18 | 0.349 | 36.081      | 12.584 | 15623     |            | 18 | 0.117 | 21.894      | 2.551  | 4948      |
|            | 19 | 0.349 | 37.727      | 13.159 | 16336     |            | 19 | 0.104 | 21.289      | 2.206  | 4279      |
|            | 20 | 0.349 | 57.497      | 20.054 | 24896     |            | 20 | 0.126 | 28.739      | 3.63   | 7041      |
|            | 21 | 0.362 | 32.029      | 11.584 | 14381     |            | 21 | 0.164 | 29.028      | 4.759  | 9231      |
|            | 22 | 0.362 | 16.88       | 6.105  | 7579      |            | 22 | 0.119 | 24.9        | 2.952  | 5727      |
|            | 23 | 0.362 | 32.107      | 11.612 | 14416     |            | 23 | 0.113 | 25.918      | 2.926  | 5676      |
|            | 24 | 0.362 | 31.857      | 11.522 | 14304     |            | 24 | 0.123 | 20.854      | 2.569  | 4984      |
|            | 25 | 0.362 | 38.67       | 13.986 | 17363     |            | 25 | 0.123 | 22.454      | 2.755  | 5344      |
|            | 26 | 0.362 | 25.739      | 9.309  | 11557     |            | 26 | 0.11  | 19.315      | 2.121  | 4114      |
|            | 27 | 0.362 | 25.842      | 9.346  | 11603     |            | 27 | 0.116 | 23.929      | 2.776  | 5384      |
|            | 28 | 0.362 | 26.078      | 9.432  | 11709     |            | 28 | 0.18  | 32.157      | 5.802  | 11255     |
|            | 29 | 0.362 | 15.43       | 5.581  | 6928      |            | 29 | 0.119 | 31.515      | 3.753  | 7280      |

|                    |    |             |        |        |       |            |                    |             |             |       |      |
|--------------------|----|-------------|--------|--------|-------|------------|--------------------|-------------|-------------|-------|------|
|                    | 30 | 0.362       | 19.027 | 6.881  | 8543  |            | 30                 | 0.1         | 30.263      | 3.027 | 5871 |
|                    | 31 | 0.421       | 36.201 | 15.251 | 18933 |            | 31                 | 0.137       | 26.272      | 3.589 | 6962 |
| Avg (-background): |    | 26.63205484 |        |        |       |            | 32                 | 0.114       | 22.611      | 2.576 | 4997 |
| Std Dev:           |    | 8.706465933 |        |        |       |            | 33                 | 0.148       | 32.618      | 4.843 | 9394 |
| Std Error:         |    | 1.563727443 |        |        |       |            | Avg (-background): |             | 21.58455758 |       |      |
| BG                 | 1  | 0.421       | 1.677  | 0.706  | 877   | Std Dev:   |                    | 5.028379082 |             |       |      |
|                    | 2  | 0.421       | 2.193  | 0.924  | 1147  | Std Error: |                    | 0.875328444 |             |       |      |
|                    | 3  | 0.421       | 2.447  | 1.031  | 1280  | BG         | 1                  | 0.107       | 4.937       | 0.527 | 1022 |
|                    | 4  | 0.421       | 2.034  | 0.857  | 1064  |            | 2                  | 0.107       | 4.986       | 0.532 | 1032 |
|                    | 5  | 0.421       | 1.792  | 0.755  | 937   |            | 3                  | 0.104       | 4.297       | 0.447 | 868  |
|                    | 6  | 0.421       | 1.57   | 0.661  | 821   |            | 4                  | 0.107       | 4.213       | 0.45  | 872  |
|                    | 7  | 0.421       | 2.096  | 0.883  | 1096  |            | 5                  | 0.107       | 4.357       | 0.465 | 902  |
|                    | 8  | 0.421       | 1.95   | 0.822  | 1020  |            | 6                  | 0.107       | 4.961       | 0.529 | 1027 |
|                    | 9  | 0.421       | 1.553  | 0.654  | 812   |            | 7                  | 0.107       | 4.836       | 0.516 | 1001 |
|                    | 10 | 0.421       | 1.721  | 0.725  | 900   |            | 8                  | 0.107       | 4.7         | 0.502 | 973  |
| Avg:               |    | 1.9033      |        |        |       |            | 9                  | 0.107       | 4.952       | 0.528 | 1025 |
|                    |    |             |        |        |       |            | 10                 | 0.107       | 5.193       | 0.554 | 1075 |
|                    |    |             |        |        |       | Avg:       |                    | 4.7432      |             |       |      |

| MRSA-BAA40         |    |             | Red Channel |        |           | MRSA-BAA40 |                    |             | Red Channel |        |           |
|--------------------|----|-------------|-------------|--------|-----------|------------|--------------------|-------------|-------------|--------|-----------|
| Series03           |    | Area        | Mean        | IntDen | RawIntDen | Series04   |                    | Area        | Mean        | IntDen | RawIntDen |
| Cell               | 1  | 0.144       | 36.804      | 5.312  | 10305     | Cell       | 1                  | 0.103       | 25.575      | 2.637  | 5115      |
|                    | 2  | 0.139       | 21.637      | 3.012  | 5842      |            | 2                  | 0.123       | 29.444      | 3.628  | 7037      |
|                    | 3  | 0.213       | 21.075      | 4.498  | 8725      |            | 3                  | 0.116       | 39.582      | 4.591  | 8906      |
|                    | 4  | 0.241       | 30.45       | 7.331  | 14220     |            | 4                  | 0.127       | 30.502      | 3.884  | 7534      |
|                    | 5  | 0.163       | 27.82       | 4.532  | 8791      |            | 5                  | 0.131       | 40.193      | 5.263  | 10209     |
|                    | 6  | 0.139       | 46.226      | 6.434  | 12481     |            | 6                  | 0.113       | 25.836      | 2.93   | 5684      |
|                    | 7  | 0.229       | 30.649      | 7.031  | 13639     |            | 7                  | 0.112       | 18.064      | 2.03   | 8015      |
|                    | 8  | 0.16        | 24.379      | 3.909  | 7582      |            | 8                  | 0.128       | 32.189      | 4.132  | 5158      |
|                    | 9  | 0.239       | 30.054      | 7.189  | 13945     |            | 9                  | 0.105       | 25.409      | 2.659  | 9320      |
|                    | 10 | 0.111       | 18.386      | 2.038  | 3953      |            | 10                 | 0.124       | 38.672      | 4.805  | 5856      |
|                    | 11 | 0.178       | 19.272      | 3.428  | 6649      |            | 11                 | 0.129       | 23.424      | 3.019  | 9530      |
|                    | 12 | 0.126       | 28.498      | 3.599  | 6982      |            | 12                 | 0.156       | 31.452      | 4.913  | 3595      |
|                    | 13 | 0.131       | 22.752      | 2.979  | 5779      |            | 13                 | 0.107       | 17.367      | 1.853  | 5733      |
|                    | 14 | 0.212       | 30.167      | 6.407  | 12429     |            | 14                 | 0.13        | 22.75       | 2.955  | 3591      |
|                    | 15 | 0.141       | 21.157      | 2.988  | 5797      |            | 15                 | 0.12        | 15.478      | 1.851  | 3938      |
|                    | 16 | 0.112       | 16.76       | 1.875  | 3637      |            | Avg (-background): |             | 22.65013333 |        |           |
| Avg (-background): |    | 23.108175   |             |        |           | Std Dev:   |                    | 7.872994247 |             |        |           |
| Std Dev:           |    | 7.62787086  |             |        |           | Std Error: |                    | 2.032798373 |             |        |           |
| Std Error:         |    | 1.906967715 |             |        |           | BG         | 1                  | 0.123       | 5.412       | 0.664  | 1288      |
| BG                 | 1  | 0.123       | 3.416       | 0.419  | 813       |            | 2                  | 0.123       | 5.13        | 0.629  | 1221      |
|                    | 2  | 0.123       | 3.218       | 0.395  | 766       |            | 3                  | 0.123       | 5.525       | 0.678  | 1315      |
|                    | 3  | 0.123       | 3.324       | 0.408  | 791       |            | 4                  | 0.123       | 5.601       | 0.687  | 1333      |

|      |    |        |       |       |     |  |  |      |       |       |       |      |
|------|----|--------|-------|-------|-----|--|--|------|-------|-------|-------|------|
|      | 4  | 0.123  | 3.651 | 0.448 | 869 |  |  | 5    | 0.123 | 4.866 | 0.597 | 1158 |
|      | 5  | 0.123  | 4.008 | 0.492 | 954 |  |  | 6    | 0.123 | 4.298 | 0.527 | 1023 |
|      | 6  | 0.123  | 3.962 | 0.486 | 943 |  |  | 7    | 0.123 | 4.483 | 0.55  | 1067 |
|      | 7  | 0.123  | 3.399 | 0.417 | 809 |  |  | 8    | 0.123 | 4.975 | 0.61  | 1184 |
|      | 8  | 0.123  | 4.038 | 0.495 | 961 |  |  | 9    | 0.123 | 5.143 | 0.631 | 1224 |
|      | 9  | 0.123  | 2.748 | 0.337 | 654 |  |  | 10   | 0.123 | 5.357 | 0.657 | 1275 |
|      | 10 | 0.123  | 3.458 | 0.424 | 823 |  |  | Avg: |       | 5.079 |       |      |
| Avg: |    | 3.5222 |       |       |     |  |  |      |       |       |       |      |

| MRSA-BAA40         |    | Red Channel |        |        |           |
|--------------------|----|-------------|--------|--------|-----------|
| Series05           |    | Area        | Mean   | IntDen | RawIntDen |
| Cell               | 1  | 0.114       | 34.095 | 3.902  | 7569      |
|                    | 2  | 0.144       | 60.039 | 8.635  | 16751     |
|                    | 3  | 0.119       | 32.333 | 3.85   | 7469      |
|                    | 4  | 0.121       | 35.615 | 4.296  | 8334      |
|                    | 5  | 0.105       | 34.235 | 3.6    | 6984      |
|                    | 6  | 0.134       | 23.112 | 3.086  | 5986      |
|                    | 7  | 0.13        | 29.306 | 3.807  | 7385      |
|                    | 8  | 0.131       | 32.638 | 4.274  | 8290      |
|                    | 9  | 0.188       | 45     | 8.444  | 16380     |
|                    | 10 | 0.121       | 36.628 | 4.419  | 8571      |
|                    | 11 | 0.114       | 34.045 | 3.896  | 7558      |
|                    | 12 | 0.126       | 31.074 | 3.909  | 7582      |
|                    | 13 | 0.106       | 28.597 | 3.037  | 5891      |
|                    | 14 | 0.148       | 34.436 | 5.095  | 9883      |
| Avg (-background): |    | 26.40105714 |        |        |           |
| Std Dev:           |    | 8.661895073 |        |        |           |
| Std Error:         |    | 2.314988834 |        |        |           |
| BG                 | 1  | 0.132       | 9.332  | 1.232  | 2389      |
|                    | 2  | 0.132       | 9.777  | 1.29   | 2503      |
|                    | 3  | 0.132       | 8.188  | 1.081  | 2096      |
|                    | 4  | 0.132       | 8.516  | 1.124  | 2180      |
|                    | 5  | 0.132       | 7.301  | 0.964  | 1869      |
|                    | 6  | 0.132       | 7.824  | 1.033  | 2003      |
|                    | 7  | 0.132       | 8.484  | 1.12   | 2172      |
|                    | 8  | 0.132       | 9.102  | 1.201  | 2330      |
|                    | 9  | 0.132       | 9.488  | 1.252  | 2429      |
|                    | 10 | 0.132       | 8.801  | 1.161  | 2253      |
| Avg:               |    | 8.6813      |        |        |           |

| MRSA-USA300 |   | Red Channel |        |        |           | MRSA-USA300 |   | Red Channel |        |        |           |
|-------------|---|-------------|--------|--------|-----------|-------------|---|-------------|--------|--------|-----------|
| Series01    |   | Area        | Mean   | IntDen | RawIntDen | Series02    |   | Area        | Mean   | IntDen | RawIntDen |
| Cell        | 1 | 0.188       | 23.433 | 4.398  | 5460      | Cell        | 1 | 0.342       | 35.141 | 12.03  | 14935     |

|                    |    |       |             |        |       |                    |    |       |             |       |      |
|--------------------|----|-------|-------------|--------|-------|--------------------|----|-------|-------------|-------|------|
|                    | 2  | 0.171 | 26.208      | 4.475  | 5556  |                    | 2  | 0.141 | 30.697      | 4.327 | 5372 |
|                    | 3  | 0.155 | 20.663      | 3.212  | 3988  |                    | 3  | 0.172 | 23.953      | 4.11  | 5102 |
|                    | 4  | 0.28  | 29.107      | 8.136  | 10100 |                    | 4  | 0.176 | 23.009      | 4.04  | 5016 |
|                    | 5  | 0.242 | 24.697      | 5.968  | 7409  |                    | 5  | 0.184 | 28.465      | 5.228 | 6490 |
|                    | 6  | 0.248 | 21.448      | 5.321  | 6606  |                    | 6  | 0.17  | 36.18       | 6.149 | 7634 |
|                    | 7  | 0.268 | 35.559      | 9.538  | 11841 |                    | 7  | 0.176 | 22.886      | 4.037 | 5012 |
|                    | 8  | 0.293 | 20.044      | 5.877  | 7296  |                    | 8  | 0.176 | 18.699      | 3.299 | 4095 |
|                    | 9  | 0.138 | 23.088      | 3.18   | 3948  |                    | 9  | 0.278 | 19.426      | 5.398 | 6702 |
|                    | 10 | 0.151 | 17.481      | 2.633  | 3269  |                    | 10 | 0.146 | 22.89       | 3.337 | 4143 |
|                    | 11 | 0.242 | 18.127      | 4.38   | 5438  |                    | 11 | 0.226 | 20.411      | 4.603 | 5715 |
|                    | 12 | 0.249 | 16.32       | 4.062  | 5043  |                    | 12 | 0.236 | 32.635      | 7.702 | 9562 |
|                    | 13 | 0.262 | 27.557      | 7.214  | 8956  |                    | 13 | 0.271 | 20.582      | 5.587 | 6936 |
|                    | 14 | 0.227 | 23.674      | 5.378  | 6676  |                    | 14 | 0.147 | 21.76       | 3.208 | 3982 |
|                    | 15 | 0.159 | 22.409      | 3.574  | 4437  |                    | 15 | 0.162 | 27.239      | 4.41  | 5475 |
|                    | 16 | 0.179 | 19.396      | 3.468  | 4306  |                    | 16 | 0.144 | 25.944      | 3.741 | 4644 |
|                    | 17 | 0.19  | 16.775      | 3.189  | 3959  |                    | 17 | 0.132 | 26.915      | 3.555 | 4414 |
|                    | 18 | 0.331 | 21.275      | 7.043  | 8744  |                    | 18 | 0.147 | 26.219      | 3.865 | 4798 |
|                    | 19 | 0.377 | 43.235      | 16.299 | 20234 |                    | 19 | 0.182 | 21.204      | 3.86  | 4792 |
|                    | 20 | 0.212 | 19.084      | 4.043  | 5019  |                    | 20 | 0.209 | 17.723      | 3.712 | 4608 |
|                    | 21 | 0.319 | 28.321      | 9.034  | 11215 |                    | 21 | 0.194 | 18.734      | 3.637 | 4515 |
|                    | 22 | 0.183 | 15.868      | 2.901  | 3602  |                    | 22 | 0.143 | 20.472      | 2.935 | 3644 |
|                    | 23 | 0.136 | 17.746      | 2.416  | 2999  |                    | 23 | 0.136 | 31.361      | 4.269 | 5300 |
|                    | 24 | 0.173 | 26.484      | 4.587  | 5694  |                    | 24 | 0.178 | 23.729      | 4.224 | 5244 |
|                    | 25 | 0.191 | 16.245      | 3.101  | 3850  |                    | 25 | 0.28  | 19.635      | 5.504 | 6833 |
|                    | 26 | 0.163 | 19.01       | 3.093  | 3840  |                    | 26 | 0.19  | 35.441      | 6.737 | 8364 |
| Avg (-background): |    |       | 20.87866154 |        |       | Avg (-background): |    |       | 22.63727143 |       |      |
| Std Dev:           |    |       | 6.338790176 |        |       | Std Dev:           |    |       | 5.408819752 |       |      |
| Std Error:         |    |       | 1.243139031 |        |       | Std Error:         |    |       | 1.022170854 |       |      |
| BG                 | 1  | 0.35  | 2.558       | 0.894  | 1110  | BG                 | 1  | 0.514 | 2.13        | 1.095 | 1359 |
|                    | 2  | 0.35  | 1.544       | 0.54   | 670   |                    | 2  | 0.514 | 2.053       | 1.055 | 1310 |
|                    | 3  | 0.35  | 0.226       | 0.079  | 98    |                    | 3  | 0.514 | 2.082       | 1.07  | 1328 |
|                    | 4  | 0.35  | 0.15        | 0.052  | 65    |                    | 4  | 0.514 | 2.649       | 1.361 | 1690 |
|                    | 5  | 0.35  | 2.804       | 0.98   | 1217  |                    | 5  | 0.514 | 2.741       | 1.409 | 1749 |
|                    | 6  | 0.35  | 2.749       | 0.961  | 1193  |                    | 6  | 0.514 | 2.188       | 1.124 | 1396 |
|                    | 7  | 0.35  | 0.316       | 0.11   | 137   |                    | 7  | 0.514 | 2.375       | 1.22  | 1515 |
|                    | 8  | 0.35  | 2.926       | 1.023  | 1270  |                    | 8  | 0.514 | 2.335       | 1.2   | 1490 |
|                    | 9  | 0.35  | 2.878       | 1.006  | 1249  |                    | 9  | 0.514 | 1.994       | 1.025 | 1272 |
|                    | 10 | 0.35  | 3.237       | 1.132  | 1405  |                    | 10 | 0.514 | 2.571       | 1.321 | 1640 |
| Avg:               |    |       | 1.9388      |        |       | Avg:               |    |       | 2.3118      |       |      |

|             |             |             |             |
|-------------|-------------|-------------|-------------|
| MRSA-USA300 | Red Channel | MRSA-USA300 | Red Channel |
|-------------|-------------|-------------|-------------|

| Series03           |    |             |        |        |           | Series04           |    |             |        |        |           |
|--------------------|----|-------------|--------|--------|-----------|--------------------|----|-------------|--------|--------|-----------|
|                    |    | Area        | Mean   | IntDen | RawIntDen |                    |    | Area        | Mean   | IntDen | RawIntDen |
| Cell               | 1  | 0.122       | 27.349 | 3.348  | 4157      | Cell               | 1  | 0.191       | 16.482 | 3.152  | 6115      |
|                    | 2  | 0.124       | 22.273 | 2.763  | 3430      |                    | 2  | 0.276       | 26.062 | 7.188  | 13943     |
|                    | 3  | 0.118       | 27.212 | 3.2    | 3973      |                    | 3  | 0.172       | 14.895 | 2.565  | 4975      |
|                    | 4  | 0.101       | 24.392 | 2.456  | 3049      |                    | 4  | 0.149       | 23.536 | 3.507  | 6802      |
|                    | 5  | 0.13        | 31.441 | 4.077  | 5062      |                    | 5  | 0.168       | 23.843 | 3.995  | 7749      |
|                    | 6  | 0.113       | 23.443 | 2.644  | 3282      |                    | 6  | 0.215       | 27.368 | 5.898  | 11440     |
|                    | 7  | 0.111       | 23.63  | 2.627  | 3261      |                    | 7  | 0.276       | 22.297 | 6.15   | 11929     |
|                    | 8  | 0.1         | 22.887 | 2.286  | 2838      |                    | 8  | 0.221       | 16.801 | 3.707  | 7191      |
|                    | 9  | 0.121       | 17.78  | 2.148  | 2667      |                    | 9  | 0.163       | 22.823 | 3.718  | 7212      |
|                    | 10 | 0.104       | 22.465 | 2.334  | 2898      |                    | 10 | 0.219       | 25.519 | 5.578  | 10820     |
|                    | 11 | 0.118       | 21.644 | 2.545  | 3160      |                    | 11 | 0.165       | 18.442 | 3.052  | 5920      |
|                    | 12 | 0.133       | 22.103 | 2.938  | 3647      |                    | 12 | 0.201       | 23.138 | 4.652  | 9024      |
|                    | 13 | 0.121       | 20.427 | 2.468  | 3064      | Avg (-background): |    | 19.78246667 |        |        |           |
|                    | 14 | 0.114       | 19.475 | 2.212  | 2746      | Std Dev:           |    | 4.106346902 |        |        |           |
|                    | 15 | 0.116       | 24.5   | 2.842  | 3528      | Std Error:         |    | 1.185400245 |        |        |           |
|                    | 16 | 0.109       | 24.711 | 2.687  | 3336      | BG                 | 1  | 0.386       | 1.981  | 0.765  | 1484      |
|                    | 17 | 0.128       | 27.264 | 3.492  | 4335      |                    | 2  | 0.386       | 1.629  | 0.629  | 1220      |
|                    | 18 | 0.118       | 20.075 | 2.377  | 2951      |                    | 3  | 0.386       | 2.007  | 0.775  | 1503      |
|                    | 19 | 0.108       | 20.022 | 2.161  | 2683      |                    | 4  | 0.386       | 1.825  | 0.705  | 1367      |
| Avg (-background): |    | 21.26998421 |        |        |           |                    | 5  | 0.386       | 2.053  | 0.793  | 1538      |
| Std Dev:           |    | 3.325245673 |        |        |           |                    | 6  | 0.386       | 2.152  | 0.831  | 1612      |
| Std Error:         |    | 0.762863676 |        |        |           |                    | 7  | 0.386       | 1.802  | 0.696  | 1350      |
| BG                 | 1  | 0.11        | 1.838  | 0.201  | 250       |                    | 8  | 0.386       | 2.166  | 0.836  | 1622      |
|                    | 2  | 0.11        | 2.316  | 0.254  | 315       |                    | 9  | 0.386       | 2.053  | 0.793  | 1538      |
|                    | 3  | 0.11        | 1.706  | 0.187  | 232       |                    | 10 | 0.386       | 2.179  | 0.841  | 1632      |
|                    | 4  | 0.11        | 1.713  | 0.188  | 233       | Avg:               |    | 1.9847      |        |        |           |
|                    | 5  | 0.11        | 2.096  | 0.23   | 285       |                    |    |             |        |        |           |
|                    | 6  | 0.11        | 1.721  | 0.188  | 234       |                    |    |             |        |        |           |
|                    | 7  | 0.11        | 2.243  | 0.246  | 305       |                    |    |             |        |        |           |
|                    | 8  | 0.11        | 2.544  | 0.279  | 346       |                    |    |             |        |        |           |
|                    | 9  | 0.11        | 2.279  | 0.25   | 310       |                    |    |             |        |        |           |
|                    | 10 | 0.11        | 2.051  | 0.225  | 279       |                    |    |             |        |        |           |
| Avg:               |    | 2.0507      |        |        |           |                    |    |             |        |        |           |

| MRSA-USA300 |   |       |        |        |           | MRSA-USA300 |   |       |        |        |           |
|-------------|---|-------|--------|--------|-----------|-------------|---|-------|--------|--------|-----------|
| Red Channel |   |       |        |        |           | Red Channel |   |       |        |        |           |
| Series05    |   | Area  | Mean   | IntDen | RawIntDen | Series06    |   | Area  | Mean   | IntDen | RawIntDen |
| Cell        | 1 | 0.219 | 38.856 | 8.493  | 16475     | Cell        | 1 | 0.156 | 23.139 | 3.614  | 7011      |
|             | 2 | 0.211 | 19.443 | 4.099  | 7952      |             | 2 | 0.125 | 25.634 | 3.211  | 6229      |
|             | 3 | 0.203 | 23.567 | 4.775  | 9262      |             | 3 | 0.206 | 25.325 | 5.222  | 10130     |
|             | 4 | 0.216 | 39.095 | 8.445  | 16381     |             | 4 | 0.168 | 28.485 | 4.787  | 9286      |
|             | 5 | 0.196 | 38.969 | 7.654  | 14847     |             | 5 | 0.195 | 34.639 | 6.768  | 13128     |
|             | 6 | 0.176 | 31.692 | 5.571  | 10807     |             | 6 | 0.152 | 19.2   | 2.92   | 5664      |

|                    |       |             |        |       |       |                    |       |             |        |       |      |
|--------------------|-------|-------------|--------|-------|-------|--------------------|-------|-------------|--------|-------|------|
|                    | 7     | 0.199       | 41.391 | 8.236 | 15977 |                    | 7     | 0.125       | 17.407 | 2.181 | 4230 |
|                    | 8     | 0.192       | 21.614 | 4.156 | 8062  |                    | 8     | 0.125       | 16.819 | 2.107 | 4087 |
|                    | 9     | 0.224       | 20.278 | 4.547 | 8821  | Avg (-background): |       | 21.7166     |        |       |      |
|                    | 10    | 0.234       | 19.725 | 4.616 | 8955  | Std Dev:           |       | 6.051167184 |        |       |      |
|                    | 11    | 0.175       | 20.558 | 3.593 | 6969  | Std Error:         |       | 2.139410675 |        |       |      |
| Avg (-background): |       | 26.70185455 |        |       |       | BG                 | 1     | 0.232       | 2.355  | 0.547 | 1062 |
| Std Dev:           |       | 9.30949216  |        |       |       |                    | 2     | 0.232       | 2.716  | 0.632 | 1225 |
| Std Error:         |       | 2.806917498 |        |       |       |                    | 3     | 0.232       | 1.659  | 0.386 | 748  |
| 1                  | 0.727 | 2.172       | 1.579  | 3062  | 4     |                    | 0.232 | 2.82        | 0.656  | 1272  |      |
| 2                  | 0.727 | 1.825       | 1.326  | 2573  | 5     |                    | 0.232 | 2.16        | 0.502  | 974   |      |
| 3                  | 0.727 | 2.323       | 1.688  | 3275  | 6     |                    | 0.232 | 2.614       | 0.608  | 1179  |      |
| 4                  | 0.727 | 1.862       | 1.354  | 2626  | 7     |                    | 0.232 | 1.437       | 0.334  | 648   |      |
| 5                  | 0.727 | 1.987       | 1.444  | 2802  | 8     |                    | 0.232 | 2.106       | 0.49   | 950   |      |
| 6                  | 0.727 | 1.733       | 1.259  | 2443  | 9     |                    | 0.232 | 1.539       | 0.358  | 694   |      |
| 7                  | 0.19  | 2.084       | 0.395  | 767   | 10    |                    | 0.232 | 1.738       | 0.404  | 784   |      |
| Avg:               |       | 1.9516      |        |       |       | Avg:               |       | 2.1144      |        |       |      |

Overall values used for chart:

|                      | <b>MRSA-<br/>BAA40</b> | <b>MRSA-<br/>USA300</b> | <b><i>E. faecalis</i><br/>V583</b> | <b><i>B. subtilis</i><br/>6633</b> | <b><i>E. coli</i><br/>K-12</b> | <b><i>P. aeruginosa</i><br/>PA01</b> |
|----------------------|------------------------|-------------------------|------------------------------------|------------------------------------|--------------------------------|--------------------------------------|
|                      | 26.63205484            | 20.87866154             | 26.066875                          | 7.091285714                        | 16.778387                      | 14.63372609                          |
|                      | 21.58455758            | 22.63727143             | 23.11712941                        | 9.938566667                        | 14.202183                      | 15.7658087                           |
|                      | 23.108175              | 21.26998421             | 27.35383846                        | 8.160666667                        | 12.966738                      | 14.65429167                          |
|                      | 22.65013333            | 19.78246667             |                                    | 7.91946                            | 17.167541                      | 15.23216667                          |
|                      | 26.40105714            | 21.7166                 |                                    | 7.444172727                        | 13.292159                      |                                      |
|                      |                        | 26.70185455             |                                    |                                    |                                |                                      |
| <b>Average</b>       | <b>24.07519558</b>     | <b>22.16447306</b>      | <b>25.51261429</b>                 | <b>8.110830355</b>                 | <b>14.881402</b>               | <b>15.07149828</b>                   |
| <b>No of cells</b>   | 109                    | 104                     | 105                                | 105                                | 106                            | 100                                  |
| <b>Std Dev</b>       | 7.654065019            | 5.960115982             | 8.286341025                        | 2.316132294                        | 4.8666858                      | 3.652046134                          |
| <b>Std Error (±)</b> | <b>0.366563233</b>     | <b>0.292218728</b>      | <b>0.404332041</b>                 | <b>0.113015684</b>                 | <b>0.2363472</b>               | <b>0.182602307</b>                   |

### Isothermal Titration Calorimetry (ITC)

ITC experiments were performed using Microcal PEAQ-ITC instrument (Malvern Instruments Ltd, Malvern, UK). The solutions of PGOs (30  $\mu\text{M}$ ) and PBP1a (300 nM) in deionized water were prepared fresh before each experiment and three replicates were performed for each setting. 0.4  $\mu\text{L}$  of PGOs solution was titrated into 300  $\mu\text{L}$  *E. coli* PBP1a solution followed by twelve 3- $\mu\text{L}$  injections at 150 seconds intervals. The reaction cell was stirred at 750 rpm and reference was set at 10  $\mu\text{cal/s}$ . The data were all obtained and analysed using Microcal softwares.

**Figure S26** | ITC plot of PGOs and PBP1a

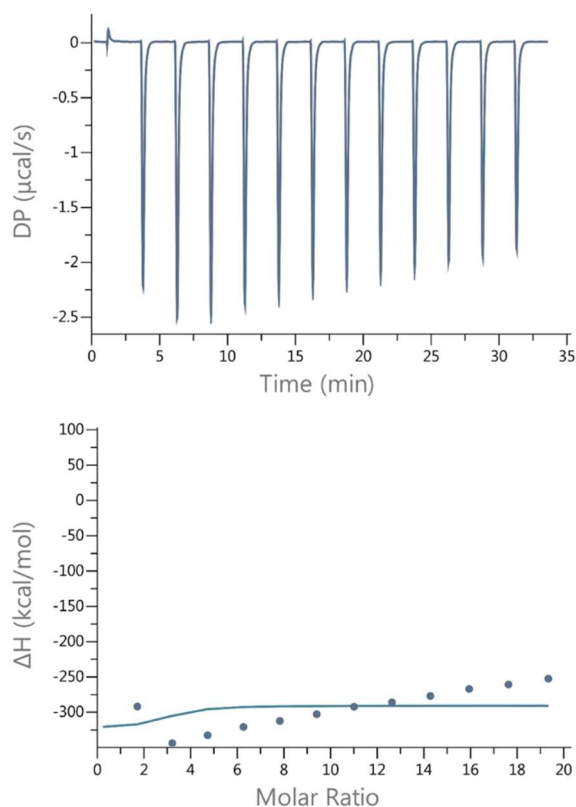

### Minimal inhibition concentration (MIC) determination

Bacteria cells were grown overnight at 37  $^{\circ}\text{C}$  in Mueller–Hinton broth (MHB) to mid log phase and diluted to  $10^5$ - $10^6$  CFU  $\text{mL}^{-1}$  in MHB. A 2-fold dilution series of 100  $\mu\text{L}$  of polymer solution in medium was made in 96-well microplates, followed by the addition of 100  $\mu\text{L}$  of the



bacterial suspension ( $10^5$  -  $10^6$  CFU mL<sup>-1</sup>). The plates were incubated at 37 °C for 18–24 h, and the absorbance at 600 nm was measured with a microplate reader (BIO-RAD Benchmark Plus). A positive control with 1 µg/mL vancomycin, a negative control without polymer, and a blank without bacteria were included. MICs were determined as the lowest concentration that inhibited cell growth by more than 90%. **17** had an MIC of 32 mg/mL against MRSA USA300 and *S. aureus* ATCC29213.

### **Cytotoxicity evaluation**

NIH 3T3 cells ( $1 \times 10^4$  cells/well) were seeded with complete medium on a 96-well plate and cultured overnight. The old medium was replaced with fresh medium containing polymer for 24 hours. Then, 10 µL MTT solutions were added to the media. After incubation for 2 hours, the OD<sub>450nm</sub> of the media was measured by using a microplate reader. The cell viability was calculated using the formula: % cell viability = (AbsTest - AbsBlank) / (AbsControl - AbsBlank) × 100%. **17** had an IC<sub>50</sub> of > 2048 µg/mL against 3T3 cell line.

### **Bacterial detection with PGOs**

For limit of detection, 1 mL *E. coli* EC958 was prepared at different concentrations each, and PGOs-rhodamine (200 µg) was added for metabolic labeling for 1 hour at 37 °C. All the bacteria were harvested by centrifugation at 5000 rpm for 15 min and washed with PBS for 3 times. The bacteria pellet was finally dispersed in 1ml PBS for fluorescence analysis with fluorospectrometer.

For resistant strain detection, 1 mL of drug-sensitive and drug-resistant bacteria ( $10^6$  CFU/mL)

were treated with different concentration of antibiotics (Penicillin G sodium salt) ranging from 0 to 1000 µg/ml for 2 hours. PGOs-rhodamine (50 µg) were then added for metabolic labeling for 1 hour at 37 °C. All the bacteria were harvested by centrifugation at 5000 rpm for 15 minutes and washed with PBS for 3 times. The bacteria pellet was finally dispersed in 1mL PBS for fluorescence analysis with fluorospectrometer.

### **Imaging of fluorescence *in vivo***

PGOs-Cy7.5 was prepared according to protocols given by the supplier of sulfo-Cyanine7.5 NHS ester (Lumiprobe, USA) with minor modifications. Generally, a solution of 1 mg NIR dye in DMF (300 µL) was added to a solution of 10 mg PGOs in 0.1 M aqueous NaHCO<sub>3</sub> (2.7 mL). The reaction vessel was shielded from light and the mixture was dialyzed, lyophilized after overnight stirring to give the product PGOs-Cy7.5.

*S. aureus* (ATCC29213) was intraperitoneally injected into mice to develop bacterial infection in most organs of mice, including liver and kidney. At 2 hours post-infection, 5 mg/kg of PGOs-Cy7.5 was intravenously administrated to non-infected and infected mice. Non-invasive image was taken at varied time point using IVIS SpectrumCT (PerkinElmer, USA) to track fluorescence difference. At 10 hours post-infection, mice were euthanized and dissected, and fluorescence intensity of varied organs were imaged and quantified for the fluorescence intensity. Eventually, organs were homogenized and serial diluted to get the exact bacterial CFU count.

### **References**

[1] a) S. Ifuku, T. Miwa, M. Morimoto, H. Saimoto, *Green Chem.* **2011**, *13*, 1499; b) A. Binette, J. Gagnon,

*Biomacromolecules* **2007**, *8*, 1812.

[2] a) Y. Zhang, E. J. Fechter, T.-S. A. Wang, D. Barrett, S. Walker, D. E. Kahne, *J. Am. Chem. Soc.* **2007**, *129*, 3080; b) H.-W. Shih, Y.-F. Chang, W.-J. Li, F.-C. Meng, C.-Y. Huang, C. Ma, T.-J. R. Cheng, C.-H. Wong, W.-C. Cheng, *Angew. Chem. Int. Ed.* **2012**, *51*, 10123; c) H. Liu, T. K. Ritter, R. Sadamoto, P. S. Sears, M. Wu, C.-H. Wong, *ChemBioChem* **2003**, *4*, 603.

[3] G. T. Hermanson, in *Bioconjugate Techniques (Third edition)*, Academic Press, Boston 2013, 395.

[4] T. J. Lupoli, H. Tsukamoto, E. H. Doud, T.-S. A. Wang, S. Walker, D. Kahne, *J. Am. Chem. Soc.* **2011**, *133*, 10748.

[5] S. Dumbre, A. Derouaux, E. Lescrinier, A. Piette, B. Joris, M. Terrak, P. Herdewijn, *J. Am. Chem. Soc.* **2012**, *134*, 9343.

[6] S. Chang, S. N. Cohen, *Molec. Gen. Genet.* **1979**, *168*, 111.

[7] A. Burgess, S. Vigneron, E. Brioude, J.-C. Labbé, T. Lorca, A. Castro, *Proc. Natl. Acad. Sci. USA* **2010**, *107*, 12564; R. A. McCloy, S. Rogers, C. E. Caldon, T. Lorca, A. Castro, A. Burgess, *Cell Cycle* **2014**, *13*, 1400.
